# Supplementary material for: Assembly of indenamine derivatives through in situ formed N-sulfonyliminium ion initiated cyclization
Source: Royal Society of Chemistry journal article supplement (doi:10.1039/c4cc00310a), 2014-01-01

## **Assembly of indenamine derivatives through *in situ* formed *N*-sulfonyliminium ions initiated cyclization**

Xiaohui Fan,\* Hao Lv, Yong-Hong Guan, Hong-Bo Zhu, Xiao-Meng Cui and Kun Guo

School of Chemical and Biological Engineering, Lanzhou Jiaotong University, Lanzhou, 730070,  
China, and Beijing National Laboratory for Molecular Sciences (BNLMS), Beijing, 100190,  
China.

E-mail: [fanxh@mail.lzjtu.cn](mailto:fanxh@mail.lzjtu.cn)

### **Supporting Information**

#### **Table of Contents**

|                                                                                   |            |
|-----------------------------------------------------------------------------------|------------|
| <b>General information .....</b>                                                  | <b>S2</b>  |
| <b>General procedures for the synthesis of (<i>Z</i>)-starting materials.....</b> | <b>S2</b>  |
| <b>General procedures for the synthesis of (<i>E</i>)-starting materials.....</b> | <b>S4</b>  |
| <b>General procedure for the iron-catalyzed cyclization reaction.....</b>         | <b>S5</b>  |
| <b>General Procedures for the removal of the <i>N</i>-tosyl group .....</b>       | <b>S6</b>  |
| <b>Characterization data .....</b>                                                | <b>S6</b>  |
| <b>Crystallographic data.....</b>                                                 | <b>S13</b> |
| <b>References .....</b>                                                           | <b>S15</b> |
| <b><sup>1</sup>H and <sup>13</sup>C NMR spectra .....</b>                         | <b>S16</b> |

## General information

Reactions were monitored by analytical thin-layer chromatography (TLC) using ultraviolet light, phosphomolybdic acid or  $\text{KMnO}_4$  for visualization. Purification of products was accomplished by flash chromatography on silica gel (200-300 mesh) and the purified compounds show a single spot by analytical TLC.  $^1\text{H}$  NMR and  $^{13}\text{C}$  NMR spectra were recorded at 400 and 100 MHz respectively using  $\text{CDCl}_3$  as the solvent with TMS as an internal standard. Chemical shifts  $\delta$  and coupling constants  $J$  are given in ppm (parts per million) and Hz (Hertz) respectively. High-resolution mass spectra (HRMS) were performed on an ITCI-Orbitrap Elite spectrometer. Melting points were measured on a micro melting apparatus and uncorrected.

The following starting materials **1b-1g**, **1i-1p** and **1r-1t** were prepared according to the literature procedures. The rest of chemicals were obtained from commercial sources and used without further purification. Solvents were dried before using it.

*N*-Tosylaldimine **4a** was readily accessible from the condensation of *p*-toluenesulfonamide (**2e**, 5 mmol) with commercially available methyl-*trans*-cinnamaldehyde (**1a**, 5 mmol). The reaction was carried out at room temp. in  $\text{CH}_2\text{Cl}_2$  solution using  $\text{TiCl}_4/\text{NEt}_3$  as catalyst, according to a known procedure.<sup>1</sup>

## General procedures for the synthesis of (Z)-starting materials<sup>2</sup>

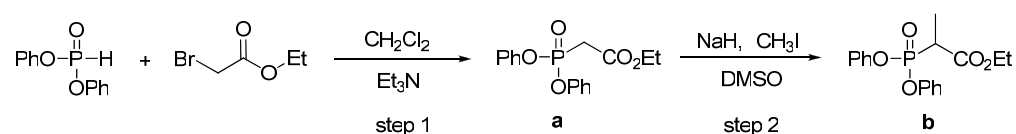

**Step 1:** To a solution of diphenyl phosphite (11.70g, 50 mmol) in anhydrous dichloromethane (50 mL) at 0 °C was added ethyl bromoacetate (8.25g, 50 mmol), followed by addition of triethylamine (7.07g, 70 mmol). The resulting mixture was stirred at 0 °C for 30 min, then warmed to room temperature and stirred for further 3 h. The resulting suspension was quenched with water (2×20 mL) and the aqueous phase was extracted with ethyl acetate (2×30 mL). The combined organic phase was washed with water and brine, dried over magnesium sulfate and concentrated *in vacuo*. Purification of the residue by flash column chromatography on silica gel (petroleum ether/EtOAc = 6/1) to afford the ethyl diphenylphosphonoacetate **a** (11.68g, 73% yield).

**Step 2:** To a solution of ethyl diphenylphosphonoacetate **a** (6.40g, 20 mmol) in DMSO (50 mL)

was added NaH (1.60g, 40 mmol, 60 % mineral dispersion) at about 15 °C in a water bath. The mixture was warmed to room temperature and stirred for 30 min, methyl iodide (4.14g, 30 mmol) was then added to the above solution. After being stirred for 3 h at room temperature, the reaction was quenched with saturated NH<sub>4</sub>Cl, and the mixture was extracted with ethyl acetate (2×30 mL). The combined extracts were washed with water (2×30 mL) followed by brine, dried by MgSO<sub>4</sub>, and concentrated to give a pale yellow residue. The crude product was subjected to flash column chromatography on silica gel (petroleum ether/EtOAc = 5/1) to provide ethyl 2-diphenylphosphonopropionate **b** (4.40g, 66% yield ).

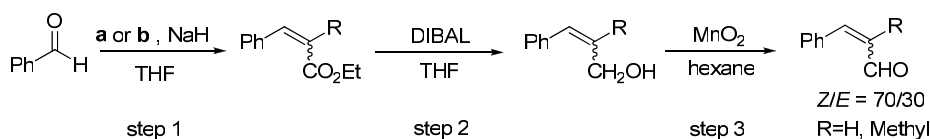

**Step 1:** To a suspension of NaH (0.52g, 13 mmol, 60 % mineral dispersion) in THF (40 mL) in a flame dried Schlenk flask at 0 °C was slowly added **a** or **b** (13 mmol). After completion of the gas formation, the reaction mixture was cooled to -78 °C, and a solution of benzaldehyde (1.06g, 10 mmol) in THF (20 mL) was added. After being stirred for 3 h at -78 °C, the reaction mixture was warmed to room temperature and quenched by addition of H<sub>2</sub>O (20 mL), the organic layer was separated and the aqueous layer was extracted with ethyl acetate. The combined organic layers were dried (MgSO<sub>4</sub>) and concentrated under vacuum. The crude product was separated by flash column chromatography on silica gel to give the corresponding  $\alpha,\beta$ -unsaturated ester (R=H, 1.53g, 87% yield; R=Methyl, 1.36g, 72% yield).

**Step 2:** To a solution of unsaturated ester (5 mmol) in THF (20 mL) at -78 °C was slowly dropwise added a 1 M solution of diisobutylaluminiumhydride in hexane (10 mL, 10 mmol) and the reaction mixture was stirred for 3 h. After addition of a saturated sodium-potassium tartrate solution (20 mL), the reaction mixture was stirred at room temperature for 1 h. After then, the organic layer was separated and washed with brine (2×20 mL). The aqueous layer was extracted with ethyl acetate (2×20 mL). The combined organic layers were dried (MgSO<sub>4</sub>), the solvent was removed under vacuum and the resulting crude alcohol was used without further purification (R=H, 0.60g, 90% yield; R=Methyl, 0.62g, 85% yield).

**Step 3:** The allylic alcohol (3 mmol) was dissolved in hexane (15 mL) and activated MnO<sub>2</sub> (0.77g, 9 mmol) was added. The suspension was stirred for 20 h at room temperature, then filtered

through Celite and the residue was washed with ethyl acetate (20 mL). The combined filtrates were concentrated under vacuum to give a mixture of (*Z*) and (*E*)-isomers (*Z/E* = 70:30). After being separated by flash chromatography on silica gel, the (*Z*)-isomer of the corresponding cinnamylaldehyde was obtained (R=H, 0.24g, 62% yield; R=Methyl, 0.23g, 53% yield).

### General procedures for the synthesis of (*E*)-starting materials: **1b-1e**, **1g**, **1i**, **1l-1p**, **1r-1t**<sup>3</sup>

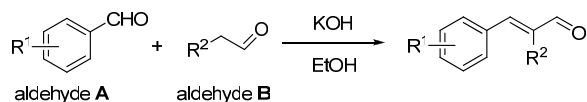

To a stirred solution of KOH (0.56g, 0.01 mol) in EtOH (25 mL, 95%) was added aldehyde **A** (0.01 mol), the mixture was cooled to 0 °C and aldehyde **B** (0.02 mol) was added slowly so that the reaction temperature did not exceed 10 °C. After being stirred for 6 h, the reaction was quenched by addition of HCl (50 mL, 3M, aq.) and extraction with Et<sub>2</sub>O (3×15 mL). The organic layer was dried over MgSO<sub>4</sub> and concentrated to give the crude product as a color residue. The crude product was purified by column chromatography on silica gel (petroleum ether/EtOAc = 9/1) to afford substituted cinnamyl aldehydes ((*E*)-isomers were obtained exclusively) **1b-1e**, **1g**, **1i**, **1l-1p** and **1r-1t**.

### The synthesis of starting material: **1f**<sup>4</sup>

To a stirred solution of benzophenone (3.60g, 0.02 mol) and TiCl<sub>4</sub> (2.2 mL of 1:1 solution of TiCl<sub>4</sub>/CH<sub>2</sub>Cl<sub>2</sub>, 0.08 mol) in anhydrous DCM (30 mL) under argon at 0 °C was added Et<sub>3</sub>N (8.10g, 0.08 mol) slowly and stirred for 0.5 h at 0 °C. After being further stirred for 8 h at 25 °C, the reaction was quenched by addition of saturated aqueous NH<sub>4</sub>Cl solution (20 mL) and stirred for 0.5 h. The organic layer was separated, and the aqueous layer was extracted with CH<sub>2</sub>Cl<sub>2</sub> (2×25 mL). The combined organic was washed with brine (10 mL) and dried over Na<sub>2</sub>SO<sub>4</sub>, and concentrated. The crude product was purified by column chromatography on silica gel (petroleum ether /EtOAc = 10/1) to afford the corresponding product **1f** ((*E*)-isomers were obtained exclusively).

### The synthesis of starting materials: **1j**, **1k**<sup>5</sup>

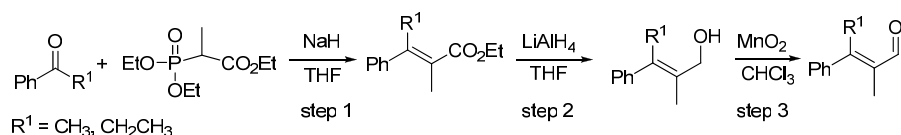

**Step 1:** To a stirred suspension of NaH (1.96g, 0.049 mol, 60 % mineral dispersion) in anhydrous THF (30 mL) at 0 °C was added triethyl 2-phosphonopropionate (1.20g, 0.05 mol) dropwise. The reaction mixture was then heated to 40 °C and stirred for 1 h. After cooling to 0 °C, phenyl ketone (0.049 mol) was added dropwise and the resulting mixture was stirred at 40 °C for further 12 h. After then, the reaction was quenched with water. The organic layer was collected, and the aqueous layer was extracted with diethyl ether (2×25 mL). The combined organic layers were dried over Na<sub>2</sub>SO<sub>4</sub>, filtered, and concentrated under reduced pressure. The crude product was subjected to flash chromatography (petroleum ether /EtOAc = 95/5) to afford the corresponding  $\alpha,\beta$ -unsaturated ester .

**Step 2:** To a solution of unsaturated ester (0.02 mol) obtained above and anhydrous THF (30 mL) was carefully added LiAlH<sub>4</sub> (1.52g, 0.04 mol) in a few portions at 0 °C. The reaction mixture was gradually warmed to room temperature and stirred for 12 h. The reaction mixture was then cooled to 0 °C and quenched with 1 M aqueous HCl. The organic layer was separated and the aqueous layer was extracted with CH<sub>2</sub>Cl<sub>2</sub> (2×25 mL). The combined organics were dried over Na<sub>2</sub>SO<sub>4</sub>, filtered, and concentrated under reduced pressure. The crude product was subjected to flash chromatography (petroleum ether /EtOAc = 1/1) to afford the corresponding allylic alcohol.

**Step 3:** To a stirred solution of allylic alcohol (0.02 mol) obtained above and anhydrous CHCl<sub>3</sub> (30 mL) was added activated MnO<sub>2</sub> (5.22g, 0.06 mol). After being stirred at 60 °C for overnight, the reaction mixture was filtered through a pad of celite. The resulting filtrate was concentrated under reduced pressure. The crude product was subjected to flash chromatography (petroleum ether /EtOAc = 95/5) to afford the corresponding aldehydes **1j** and **1k** ((*E*)-isomers were obtained exclusively).

### **General procedure for the iron-catalyzed cyclization reaction**

To a stirred solution of aldehydes **1a-1u** (0.20 mmol) in toluene (3 mL) was added sulfonylamines **2** (0.24 mmol) and FeCl<sub>3</sub> (20 mol %). The resulting mixture was stirred at 40-100 °C. After the aldehyde was completely consumed (monitored by TLC), the reaction was quenched by addition of H<sub>2</sub>O (3 mL) and then extracted with ethyl acetate (2×5 mL). The combined organic layer was washed with brine, dried over Na<sub>2</sub>SO<sub>4</sub>, and concentrated. The crude product was purified by column chromatography on silica gel (petroleum ether/EtOAc = 10/1) to afford the corresponding products.

## General procedures for the removal of the *N*-tosyl group

According to the procedures reported by the literatures, several conditions such as Mg/CH<sub>3</sub>OH,<sup>6</sup> LAH/THF,<sup>7</sup> NaOH/CH<sub>3</sub>OH,<sup>8</sup> and sodium naphthalenide solution<sup>9</sup> were tested to **3a** (0.5 mmol). However, these conditions result in the isolation of its C-C double bond regioisomer **3a'** exclusively.

## Characterization data

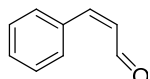

### (*Z*)-cinnamaldehyde<sup>10</sup>

<sup>1</sup>H NMR (400 MHz, CDCl<sub>3</sub>):  $\delta$  9.97 (d,  $J$  = 8.1 Hz, 1H), 7.63 (d,  $J$  = 11.6 Hz, 1H), 7.43 (m, 5H), 6.20 (dd,  $J$  = 11.6, 8.1 Hz, 1H).

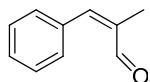

### (*Z*)-2-methyl-3-phenylacrylaldehyde ((*Z*)-1a)<sup>10</sup>

<sup>1</sup>H NMR (400 MHz, CDCl<sub>3</sub>):  $\delta$  9.90 (s, 1H), 7.60 (s, 1H), 7.39-7.30 (m, 5H), 1.98 (s, 3H).

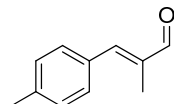

### (*E*)-2-methyl-3-*p*-tolylacrylaldehyde (1b)

<sup>1</sup>H NMR (400 MHz, CDCl<sub>3</sub>):  $\delta$  9.55 (s, 1H), 7.44 (d,  $J$  = 8.0 Hz, 2H), 7.26-7.21 (m, 3H), 2.39 (s, 3H), 2.07 (s, 3H).

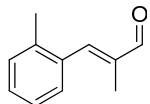

### (*E*)-2-methyl-3-*o*-tolylacrylaldehyde (1c)

<sup>1</sup>H NMR (400 MHz, CDCl<sub>3</sub>):  $\delta$  9.65 (s, 1H), 7.45 (s, 1H), 7.35-7.26 (m, 4H), 2.36 (s, 3H), 1.94 (s, 3H).

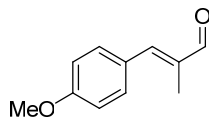

### (*E*)-3-(4-methoxyphenyl)-2-methylacrylaldehyde (1d)

<sup>1</sup>H NMR (400 MHz, CDCl<sub>3</sub>):  $\delta$  9.51 (s, 1H), 7.52 (d,  $J$  = 8.7 Hz, 2H), 7.16 (s, 1H), 6.96 (d,  $J$  = 8.7 Hz, 2H), 3.83 (s, 3H), 2.06 (s, 3H).

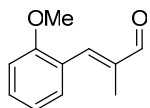

### (*E*)-3-(2-methoxyphenyl)-2-methylacrylaldehyde (1e)

<sup>1</sup>H NMR (400 MHz, CDCl<sub>3</sub>):  $\delta$  9.60 (s, 1H), 7.6 (s, 1H), 7.45-7.35 (m, 2H), 7.02-6.93 (m, 3H), 3.87 (s, 3H), 2.00 (s, 3H).

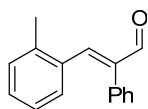

**(E)-2-phenyl-3-*o*-tolylacrylaldehyde (1g)**

$^1\text{H}$  NMR (400 MHz,  $\text{CDCl}_3$ ):  $\delta$  9.65 (s, 1H), 7.46-7.31 (m, 4H), 7.27-7.22 (m, 4H), 7.17-7.15 (m, 2H), 6.87 (t,  $J = 7.6$  Hz, 1H), 3.70 (d,  $J = 7.6$  Hz, 3H).

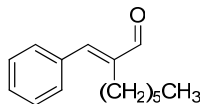

**(E)- $\alpha$ -hexylcinnamaldehyde (1h)**

$^1\text{H}$  NMR (400 MHz,  $\text{CDCl}_3$ ):  $\delta$  9.55 (s, 1H), 7.51-7.39 (m, 5H), 7.21 (s, 1H), 2.54-2.50 (m, 2H), 1.53-1.29 (m, 10H), 0.88 (m, 3H).

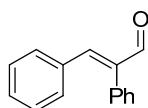

**(E)-2,3-diphenylacrylaldehyde (1i)**

$^1\text{H}$  NMR (400 MHz,  $\text{CDCl}_3$ ):  $\delta$  9.77 (s, 1H), 7.43-7.39 (m, 4H), 7.29-7.19 (m, 7H).

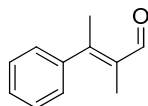

**(E)-2-methyl-3-phenylbut-2-enal (1j)**

$^1\text{H}$  NMR (400 MHz,  $\text{CDCl}_3$ ):  $\delta$  9.45 (s, 1H), 7.38 (d,  $J = 5.6$  Hz, 3H), 7.26-7.20 (m, 2H), 2.28 (s, 3H), 1.92 (s, 3H).

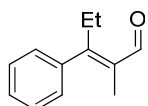

**(E)-2-methyl-3-phenylpent-2-enal (1k)**

$^1\text{H}$  NMR (400 MHz,  $\text{CDCl}_3$ ):  $\delta$  10.31 (s, 1H), 7.42-7.26 (m, 3H), 7.16-7.14 (m, 2H), 2.92 (dd,  $J = 7.5$  Hz, 2H), 1.62 (s, 3H), 1.06 (t,  $J = 7.5$  Hz, 3H).

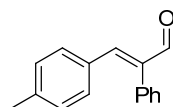

**(E)-2-phenyl-3-*p*-tolylacrylaldehyde (1l)**

$^1\text{H}$  NMR (400 MHz,  $\text{CDCl}_3$ ):  $\delta$  9.74 (s, 1H), 7.41-7.35 (m, 4H), 7.20-7.02 (m, 6H), 2.30 (s, 3H).

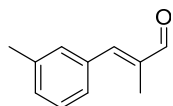

**(E)-2-methyl-3-*m*-tolylacrylaldehyde (1m)**

$^1\text{H}$  NMR (400 MHz,  $\text{CDCl}_3$ ):  $\delta$  9.57 (s, 1H), 7.34-7.21 (m, 5H), 2.40 (s, 3H), 2.08 (s, 3H).

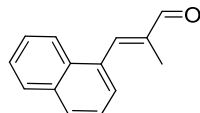

**(E)-2-methyl-3-(naphthalen-1-yl)acrylaldehyde (1o)**

<sup>1</sup>H NMR (400 MHz, CDCl<sub>3</sub>): δ 9.77 (s, 1H), 7.94-7.87 (m, 4H), 7.55-7.47 (m, 4H), 1.96 (s, 3H).

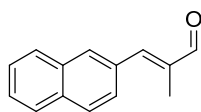

**(E)-2-methyl-3-(naphthalen-2-yl)acrylaldehyde (1p)**

<sup>1</sup>H NMR (400 MHz, CDCl<sub>3</sub>): δ 9.63 (s, 1H), 7.99 (s, 1H), 7.87-7.84 (m, 3H), 7.63-7.53 (m, 3H), 7.40 (s, 1H), 2.17 (s, 3H).

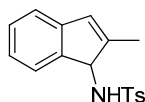

**4-methyl-N-(2-methyl-1H-inden-1-yl)benzenesulfonamide (3a): 59 mg, 98%.**

White solid; m.p. 130-132 °C; <sup>1</sup>H NMR (400 MHz, CDCl<sub>3</sub>): δ 7.88 (d, *J* = 8.2 Hz, 2H), 7.37- 6.75 (m, 7H), 6.32 (s, 1H), 4.70 (d, *J* = 9.5 Hz, 1H), 4.54 (d, *J* = 9.5 Hz, 1H), 2.47 (s, 3H), 1.89 (s, 3H); <sup>13</sup>C NMR (100 MHz, CDCl<sub>3</sub>): δ 145.9, 143.5, 143.3, 143.1, 138.4, 129.7, 128.3, 127.7, 127.1, 124.8, 123.2, 120.2, 62.3, 21.5, 13.7; HRMS (ESI, *m/z*) calcd for C<sub>17</sub>H<sub>21</sub>N<sub>2</sub>O<sub>2</sub>S [M+NH<sub>4</sub>]<sup>+</sup>: 317.1318. Found: 317.1315.

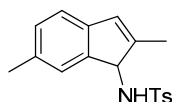

**N-(2,6-dimethyl-1H-inden-1-yl)-4-methylbenzenesulfonamide (3b): 58 mg, 92%.**

White solid; m.p. 145-147 °C; <sup>1</sup>H NMR (400 MHz, CDCl<sub>3</sub>): δ 7.88 (d, *J* = 8.2 Hz, 2H), 7.38-7.25 (m, 3H), 6.95 (s, 2H), 6.39 (s, 1H), 6.27 (s, 1H), 4.66 (d, *J* = 9.5 Hz, 1H), 4.50 (d, *J* = 9.5 Hz, 1H), 2.49 (s, 3H), 2.16 (s, 3H), 1.86 (s, 3H); <sup>13</sup>C NMR (100 MHz, CDCl<sub>3</sub>): δ 144.6, 143.6, 143.5, 140.4, 138.5, 134.5, 129.8, 128.7, 127.5, 127.3, 124.4, 119.8, 62.2, 21.5, 21.1, 13.7; HRMS (ESI, *m/z*) calcd for C<sub>18</sub>H<sub>19</sub>NNaO<sub>2</sub>S [M+Na]<sup>+</sup>: 336.1029. Found: 336.1036.

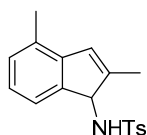

**N-(2,4-dimethyl-1H-inden-1-yl)-4-methylbenzenesulfonamide (3c): 61 mg, 98%.**

White solid; m.p. 147-148 °C; <sup>1</sup>H NMR (400 MHz, CDCl<sub>3</sub>): δ 7.88 (d, *J* = 8.2 Hz, 2H), 7.37-7.25 (m, 3H), 6.97 (d, *J* = 7.6 Hz, 1H), 6.85 (t, *J* = 7.5 Hz, 1H), 6.57 (d, *J* = 7.4 Hz, 1H), 6.43 (s, 1H), 4.70 (d, *J* = 9.6 Hz, 1H), 4.49 (d, *J* = 9.6 Hz, 1H), 2.47 (s, 3H), 2.28 (s, 3H), 1.92 (s, 3H); <sup>13</sup>C NMR (100 MHz, CDCl<sub>3</sub>): δ 145.3, 143.5, 143.2, 143.7, 138.4, 129.8, 129.5, 129.4, 127.2, 125.9, 124.9, 120.6, 62.6, 21.5, 18.0, 13.9; HRMS (APCI, *m/z*) calcd for C<sub>18</sub>H<sub>20</sub>NO<sub>2</sub>S [M+H]<sup>+</sup>: 314.1029. Found: 314.1216.

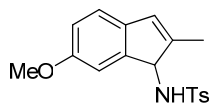

**N-(6-methoxy-2-methyl-1H-inden-1-yl)-4-methylbenzenesulfonamide (3d): 43 mg, 65%.**

White solid; m.p. 140-141 °C; <sup>1</sup>H NMR (400 MHz, CDCl<sub>3</sub>): δ 7.90 (d, *J* = 8.3 Hz, 2H), 7.38 (d, *J* = 8.0 Hz, 2H), 7.26 (s, 1H), 6.97 (d, *J* = 8.2 Hz, 1H), 6.70 (d, *J* = 8.1 Hz, 1H), 6.29-6.26 (m, 2H),



4.69 (d,  $J = 9.6$  Hz, 1H), 4.50 (d,  $J = 9.6$  Hz, 1H), 3.61 (s, 3H), 2.46 (s, 3H), 1.88 (s, 3H);  $^{13}\text{C}$  NMR (100 MHz,  $\text{CDCl}_3$ ):  $\delta$  157.7, 145.1, 143.6, 143.5, 138.6, 135.8, 129.7, 127.1, 120.5, 113.8, 109.7, 62.3, 55.2, 21.4, 13.6; HRMS (ESI,  $m/z$ ) calcd for  $\text{C}_{18}\text{H}_{19}\text{NNaO}_3\text{S}$   $[\text{M}+\text{Na}]^+$ : 352.0978. Found: 352.0982.

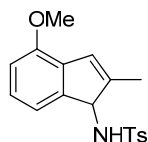

***N*-(4-methoxy-2-methyl-1*H*-inden-1-yl)-4-methylbenzenesulfonamide (3e): 53 mg, 81%.**

White solid; m.p. 145-146 °C;  $^1\text{H}$  NMR (400 MHz,  $\text{CDCl}_3$ ):  $\delta$  7.89 (d,  $J = 8.1$  Hz, 2H), 7.37-7.26 (m, 3H), 6.96-6.92 (m, 1H), 6.73 (d,  $J = 8.2$  Hz, 1H), 6.47-6.42 (m, 2H), 4.71 (d,  $J = 9.6$  Hz, 1H), 4.51 (d,  $J = 9.6$  Hz, 1H), 3.80 (s, 3H), 2.47 (s, 3H), 1.88 (s, 3H);  $^{13}\text{C}$  NMR (100 MHz,  $\text{CDCl}_3$ ):  $\delta$  151.9, 145.2, 143.9, 143.4, 138.4, 131.1, 129.6, 127.1, 126.1, 123.7, 116.1, 110.8, 62.6, 55.3, 21.4, 13.7; HRMS (ESI,  $m/z$ ) calcd for  $\text{C}_{18}\text{H}_{19}\text{NNaO}_3\text{S}$   $[\text{M}+\text{Na}]^+$ : 352.0978. Found: 352.0986.

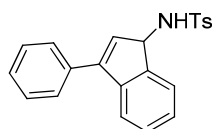

**4-methyl-*N*-(3-phenyl-1*H*-inden-1-yl)benzenesulfonamide (3f): 48 mg, 67%.**

White solid; m.p. 115-117 °C;  $^1\text{H}$  NMR (400 MHz,  $\text{CDCl}_3$ ):  $\delta$  7.87 (d,  $J = 8.2$  Hz, 2H), 7.46-7.33 (m, 8H), 7.32-7.29 (m, 2H), 7.26-7.22 (m, 2H), 6.08 (s, 1H), 5.05 (d,  $J = 9.7$  Hz, 1H), 4.59 (d,  $J = 9.7$  Hz, 1H), 2.47 (s, 3H);  $^{13}\text{C}$  NMR (100 MHz,  $\text{CDCl}_3$ ):  $\delta$  146.1, 144.2, 143.6, 141.8, 138.0, 134.4, 130.9, 129.8, 128.6, 128.4, 128.3, 127.4, 127.2, 126.4, 124.1, 120.8, 59.4, 21.5; HRMS (ESI,  $m/z$ ) calcd for  $\text{C}_{22}\text{H}_{19}\text{NNaO}_2\text{S}$   $[\text{M}+\text{Na}]^+$ : 384.1029. Found: 384.1037.

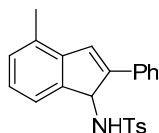

**4-methyl-*N*-(4-methyl-2-phenyl-1*H*-inden-1-yl)benzenesulfonamide (3g): 61 mg, 81%.**

White solid; m.p. 147-148 °C;  $^1\text{H}$  NMR (400 MHz,  $\text{CDCl}_3$ ):  $\delta$  7.83 (d,  $J = 8.2$  Hz, 2H), 7.34-7.32 (m, 4H), 7.25-7.19 (m, 4H), 7.10-7.07 (m, 1H), 7.05-6.97 (m, 3H), 5.45 (d,  $J = 9.0$  Hz, 1H), 4.47 (d,  $J = 9.0$  Hz, 1H), 2.49 (s, 3H), 2.39 (s, 3H);  $^{13}\text{C}$  NMR (100 MHz,  $\text{CDCl}_3$ ):  $\delta$  145.8, 144.3, 143.8, 141.0, 138.7, 133.6, 130.8, 130.0, 128.7, 128.0, 127.7, 127.2, 127.1, 126.5, 122.3, 60.0, 21.8, 18.3; HRMS (ESI,  $m/z$ ) calcd for  $\text{C}_{23}\text{H}_{21}\text{NNaO}_2\text{S}$   $[\text{M}+\text{Na}]^+$ : 398.1185. Found: 398.1184.

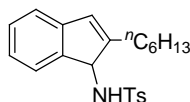

***N*-(2-hexyl-1*H*-inden-1-yl)-4-methylbenzenesulfonamide (3h): 68 mg, 92%.**

White solid; m.p. 90-92 °C;  $^1\text{H}$  NMR (400 MHz,  $\text{CDCl}_3$ ):  $\delta$  7.87 (d,  $J = 8.2$  Hz, 2H), 7.35 (d,  $J = 8.0$  Hz, 2H), 7.17-7.13 (m, 1H), 7.08 (d,  $J = 7.3$  Hz, 1H), 6.98-6.94 (m, 1H), 6.87 (m, 1H), 6.31 (s, 1H), 4.75 (d,  $J = 9.6$  Hz, 1H), 4.55 (d,  $J = 9.6$  Hz, 1H), 2.46 (s, 3H), 2.24-2.08 (m, 2H), 1.37-1.22 (m, 8H), 0.90 (m, 3H);  $^{13}\text{C}$  NMR (100 MHz,  $\text{CDCl}_3$ ):  $\delta$  150.5, 143.5, 143.4, 143.0, 138.5, 129.7,

128.3, 127.2, 126.6, 124.9, 123.5, 120.2, 61.2, 31.5, 29.0, 28.1, 27.9, 22.5, 21.4, 14.0; HRMS (ESI,  $m/z$ ) calcd for  $C_{22}H_{27}NNaO_2S$   $[M+Na]^+$ : 392.1655. Found: 392.1659.

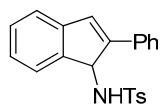

**4-methyl-N-(2-phenyl-1H-inden-1-yl)benzenesulfonamide (3i): 62 mg, 86%.**

White solid; m.p. 145-146 °C;  $^1H$  NMR (400 MHz,  $CDCl_3$ ):  $\delta$  7.83 (d,  $J$  = 8.1 Hz, 2H), 7.35-7.21 (m, 10H), 7.09 (m, 1H), 7.00 (m, 1H), 5.44 (d,  $J$  = 9.1 Hz, 1H), 4.51 (d,  $J$  = 9.1 Hz, 1H), 2.50 (s, 3H);  $^{13}C$  NMR (100 MHz,  $CDCl_3$ ):  $\delta$  146.2, 144.1, 143.6, 142.1, 138.4, 133.2, 129.7, 128.7, 128.6, 128.5, 127.8, 127.4, 126.8, 126.2, 124.6, 121.2, 59.5, 21.5; HRMS (ESI,  $m/z$ ) calcd for  $C_{22}H_{19}NNaO_2S$   $[M+Na]^+$ : 384.1029. Found: 384.1034.

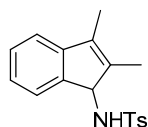

**N-(2,3-dimethyl-1H-inden-1-yl)-4-methylbenzenesulfonamide (3j): 53 mg, 85%.**

White solid; m.p. 175-176 °C;  $^1H$  NMR (400 MHz,  $CDCl_3$ ):  $\delta$  7.89 (d,  $J$  = 8.2 Hz, 2H), 7.38 (d,  $J$  = 8.0 Hz, 2H), 7.26-7.20 (m, 2H), 7.08 (d,  $J$  = 7.4 Hz, 1H), 7.00 (t,  $J$  = 7.4 Hz, 1H), 6.77 (d,  $J$  = 7.3 Hz, 1H), 4.69 (d,  $J$  = 9.2 Hz, 1H), 4.44 (d,  $J$  = 9.2 Hz, 1H), 2.48 (s, 3H), 1.94 (s, 3H), 1.81 (s, 3H);  $^{13}C$  NMR (100 MHz,  $CDCl_3$ ):  $\delta$  145.1, 143.5, 142.7, 138.6, 137.8, 134.0, 129.8, 128.2, 127.2, 125.0, 122.9, 118.2, 62.3, 21.5, 11.0, 10.2; HRMS (ESI,  $m/z$ ) calcd for  $C_{18}H_{19}NNaO_2S$   $[M+Na]^+$ : 336.1029. Found: 336.1035.

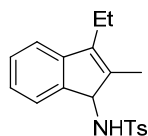

**N-(3-ethyl-2-methyl-1H-inden-1-yl)-4-methylbenzenesulfonamide (3k): 49 mg, 75%.**

White solid; m.p. 159-160 °C;  $^1H$  NMR (400 MHz,  $CDCl_3$ ):  $\delta$  7.89 (d,  $J$  = 8.1 Hz, 2H), 7.37 (d,  $J$  = 8.0 Hz, 2H), 7.25-7.10 (m, 3H), 6.98 (t,  $J$  = 7.2 Hz, 1H), 6.77 (d,  $J$  = 7.5 Hz, 1H), 4.69 (d,  $J$  = 9.3 Hz, 1H), 4.44 (d,  $J$  = 9.3 Hz, 1H), 2.47 (s, 3H), 2.42 (m, 2H), 1.81 (s, 3H), 1.10 (t,  $J$  = 7.6 Hz, 3H);  $^{13}C$  NMR (100 MHz,  $CDCl_3$ ):  $\delta$  144.1, 143.4, 143.0, 139.9, 138.6, 137.3, 129.7, 128.1, 127.2, 124.8, 123.1, 118.4, 62.3, 21.5, 18.3, 12.8, 10.8; HRMS (APCI,  $m/z$ ) calcd for  $C_{19}H_{22}NO_2S$   $[M+H]^+$ : 328.1366. Found: 328.1372.

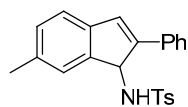

**4-methyl-N-(6-methyl-2-phenyl-1H-inden-1-yl)benzenesulfonamide (3l): 62 mg, 83%.**

White solid; m.p. 168-170 °C;  $^1H$  NMR (400 MHz,  $CDCl_3$ ):  $\delta$  7.84 (d,  $J$  = 8.2 Hz, 2H), 7.36-7.33 (m, 4H), 7.25-7.21 (m, 4H), 7.12 (d,  $J$  = 8.0 Hz, 1H), 7.03 (d,  $J$  = 8.0 Hz, 1H), 6.96 (s, 1H), 6.71 (s, 1H), 5.41 (d,  $J$  = 9.2 Hz, 1H), 4.49 (d,  $J$  = 9.2 Hz, 1H), 2.50 (s, 3H), 2.21 (s, 3H);  $^{13}C$  NMR (100 MHz,  $CDCl_3$ ):  $\delta$  145.2, 144.3, 143.6, 139.4, 138.7, 136.1, 133.3, 129.8, 129.1, 128.5, 127.6, 127.6, 126.7, 125.5, 120.9, 59.4, 21.5, 21.3; HRMS (ESI,  $m/z$ ) calcd for  $C_{23}H_{21}NNaO_2S$   $[M+Na]^+$ : 398.1185. Found: 398.1187.

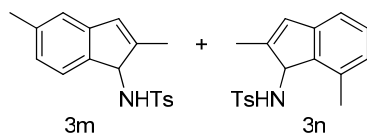

***N*-(2,5-dimethyl-1*H*-inden-1-yl)-4-methylbenzenesulfonamide (3m)**

***N*-(2,7-dimethyl-1*H*-inden-1-yl)-4-methylbenzenesulfonamide (3n)**

White solid as mixture of unseparated two cyclization products: **3m** : **3n** = 2.3 : 1 (determine by  $^1\text{H}$  NMR), 56mg, 90%. HRMS (ESI,  $m/z$ ) calcd for  $\text{C}_{18}\text{H}_{19}\text{NNaO}_2\text{S}$   $[\text{M}+\text{Na}]^+$ : 336.1029. Found: 336.1030.

**3m:**

$^1\text{H}$  NMR (400 MHz,  $\text{CDCl}_3$ ):  $\delta$  7.73 (d,  $J$  = 8.1 Hz, 2H), 7.26 (d,  $J$  = 8.1 Hz, 2H), 7.07-6.70 (m, 3H), 6.23 (s, 1H), 4.84 (d,  $J$  = 9.3 Hz, 1H), 4.45 (d,  $J$  = 9.3 Hz, 1H), 2.42 (s, 3H), 2.11 (s, 3H), 1.68 (s, 3H);  $^{13}\text{C}$  NMR (100 MHz,  $\text{CDCl}_3$ ):  $\delta$  146.1, 143.2, 143.1, 139.9, 139.2, 134.3, 129.4, 128.4, 127.1, 126.8, 125.3, 117.8, 62.3, 21.4, 17.9, 14.3.

**3n:**

$^1\text{H}$  NMR (400 MHz,  $\text{CDCl}_3$ ):  $\delta$  7.83 (d,  $J$  = 8.0 Hz, 2H), 7.33 (d,  $J$  = 8.0 Hz, 2H), 7.07-6.70 (m, 3H), 6.72-6.56 (m, 1H), 4.62 (s, 2H), 2.46 (s, 3H), 2.25 (s, 3H), 1.86 (s, 3H);  $^{13}\text{C}$  NMR (100 MHz,  $\text{CDCl}_3$ ):  $\delta$  146.2, 143.4, 143.3, 140.4, 138.5, 138.0, 129.6, 128.1, 127.6, 122.9, 121.0, 62.0, 21.5, 21.2, 13.8.

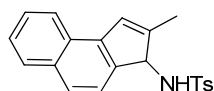

**4-methyl-*N*-(2-methyl-3*H*-cyclopenta[*a*]naphthalen-3-yl)benzenesulfonamide (3o): 51mg, 73%.**

White solid; m.p. 148-150 °C;  $^1\text{H}$  NMR (400 MHz,  $\text{CDCl}_3$ ):  $\delta$  7.89-7.76 (m, 4H), 7.49-7.34 (m, 5H), 6.98 (d,  $J$  = 8.3 Hz, 1H), 6.86 (s, 1H), 4.82 (d,  $J$  = 9.7 Hz, 1H), 4.64 (d,  $J$  = 9.7 Hz, 1H), 2.47 (s, 3H), 1.96 (s, 3H);  $^{13}\text{C}$  NMR (100 MHz,  $\text{CDCl}_3$ ):  $\delta$  146.5, 143.6, 140.1, 139.4, 138.4, 133.6, 129.8, 128.3, 127.2, 126.8, 125.8, 125.6, 125.0, 124.9, 123.7, 121.1, 63.2, 21.6, 14.0; HRMS (ESI,  $m/z$ ) calcd for  $\text{C}_{21}\text{H}_{19}\text{NNaO}_2\text{S}$   $[\text{M}+\text{Na}]^+$ : 372.1029. Found: 372.1040.

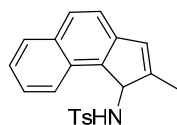

**4-methyl-*N*-(2-methyl-1*H*-cyclopenta[*a*]naphthalen-1-yl)benzenesulfonamide (3p): 67mg, 90%.**

White solid; m.p. 181-182 °C;  $^1\text{H}$  NMR (400 MHz,  $\text{CDCl}_3$ ):  $\delta$  7.72-7.58 (m, 5H), 7.20-7.11 (m, 6H), 6.32 (s, 1H), 5.07 (d,  $J$  = 9.1 Hz, 1H), 4.58 (d,  $J$  = 9.1 Hz, 1H), 2.37 (s, 3H), 1.78 (s, 3H);  $^{13}\text{C}$  NMR (100 MHz,  $\text{CDCl}_3$ ):  $\delta$  147.3, 143.4, 141.4, 138.9, 136.6, 131.8, 129.6, 129.5, 129.2, 128.7, 128.2, 127.1, 126.4, 124.3, 122.7, 119.6, 62.3, 21.5, 14.4; HRMS (ESI,  $m/z$ ) calcd for  $\text{C}_{21}\text{H}_{19}\text{NNaO}_2\text{S}$   $[\text{M}+\text{Na}]^+$ : 372.1029. Found: 372.1033.

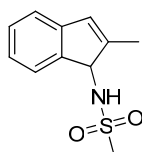

***N*-(2-methyl-1*H*-inden-1-yl)methanesulfonamide (3af): 41mg, 91%.**

White solid; m.p. 98-99 °C; <sup>1</sup>H NMR (400 MHz, CDCl<sub>3</sub>): δ 7.44 (d, *J* = 7.4 Hz, 1H), 7.20 (t, *J* = 7.4 Hz, 1H), 7.11-7.08 (m, 2H), 6.36 (s, 1H), 4.72 (d, *J* = 9.6 Hz, 1H), 4.58 (d, *J* = 9.6 Hz, 1H), 3.07 (s, 3H), 2.04 (s, 3H); <sup>13</sup>C NMR (100 MHz, CDCl<sub>3</sub>): δ 145.4, 143.4, 143.0, 128.4, 127.9, 124.9, 123.4, 120.3, 62.5, 42.3, 13.9; HRMS (ESI, *m/z*) calcd for C<sub>11</sub>H<sub>13</sub>NNaO<sub>2</sub>S [M+Na]<sup>+</sup>: 246.0559. Found: 246.0560.

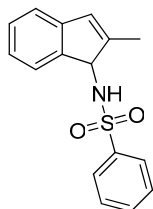

***N*-(2-methyl-1*H*-inden-1-yl)benzenesulfonamide (3ag): 47mg, 82%.**

White solid; m.p. 137-139 °C; <sup>1</sup>H NMR (400 MHz, CDCl<sub>3</sub>): δ 7.97 (d, *J* = 7.6 Hz, 2H), 7.65-7.53 (m, 3H), 7.18-7.01 (m, 2H), 6.91 (t, *J* = 7.4 Hz, 1H), 6.68 (d, *J* = 7.4 Hz, 1H), 6.30 (s, 1H), 4.67 (s, 2H), 1.86 (s, 3H); <sup>13</sup>C NMR (100 MHz, CDCl<sub>3</sub>): δ 145.7, 143.2, 143.0, 141.4, 132.7, 129.1, 128.3, 127.8, 127.0, 124.8, 123.2, 120.2, 62.3, 13.7; HRMS (ESI, *m/z*) calcd for C<sub>16</sub>H<sub>15</sub>NNaO<sub>2</sub>S [M+Na]<sup>+</sup>: 308.0716. Found: 308.0715.

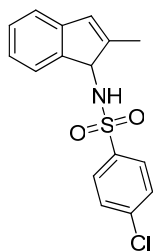

**4-chloro-*N*-(2-methyl-1*H*-inden-1-yl)benzenesulfonamide (3ah): 56mg, 87%.**

White solid; m.p. 125-126 °C; <sup>1</sup>H NMR (400 MHz, CDCl<sub>3</sub>): δ 7.87 (d, *J* = 8.4 Hz, 2H), 7.50 (d, *J* = 8.3 Hz, 2H), 7.16-6.94 (m, 3H), 6.81 (d, *J* = 7.3 Hz, 1H), 6.30 (s, 1H), 4.81 (d, *J* = 9.1 Hz, 1H), 4.64 (d, *J* = 9.0 Hz, 1H), 1.85 (s, 3H); <sup>13</sup>C NMR (100 MHz, CDCl<sub>3</sub>): δ 145.4, 143.1, 143.0, 140.0, 139.1, 129.4, 128.5, 128.4, 128.0, 124.9, 123.2, 120.3, 62.4, 13.8; HRMS (ESI, *m/z*) calcd for C<sub>16</sub>H<sub>14</sub>NNaO<sub>2</sub>SCl [M+Na]<sup>+</sup>: 342.0326. Found: 342.0327.

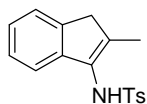

**4-methyl-*N*-(2-methyl-1*H*-inden-3-yl)benzenesulfonamide (3a')**

White solid; m.p. 122-123 °C; <sup>1</sup>H NMR (400 MHz, CDCl<sub>3</sub>): δ 7.66 (d, *J* = 8.0 Hz, 2H), 7.29 (d, *J* = 6.9 Hz, 1H), 7.22-7.03 (m, 5H), 6.17 (s, 1H), 3.26 (s, 2H), 2.38 (s, 3H), 1.77 (s, 3H); <sup>13</sup>C NMR (100 MHz, CDCl<sub>3</sub>): δ 143.6, 142.3, 141.1, 140.3, 137.0, 130.7, 129.4, 127.2, 126.1, 124.5, 123.3, 118.4, 40.7, 21.4, 13.2.

## Crystallographic data

CCDC 965332 (**3o'**) and 965333 (**3p**) contain the supplementary crystallographic data for this paper. These data can be obtained free of charge from The Cambridge Crystallographic Data Centre *via* [www.ccdc.cam.ac.uk/data\\_request/cif](http://www.ccdc.cam.ac.uk/data_request/cif)

### X-ray Crystallographic data of **3o'**

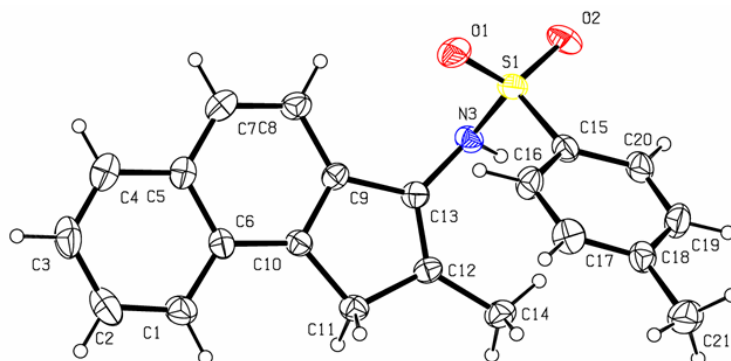

|                                             |                                                   |
|---------------------------------------------|---------------------------------------------------|
| Empirical formula                           | C <sub>21</sub> H <sub>19</sub> NO <sub>2</sub> S |
| Formula weight                              | 349.43                                            |
| Temperature/K                               | 301.19(10)                                        |
| Crystal system                              | orthorhombic                                      |
| Space group                                 | Pna2 <sub>1</sub>                                 |
| a/Å                                         | 10.2086(5)                                        |
| b/Å                                         | 7.3342(6)                                         |
| c/Å                                         | 23.4547(12)                                       |
| α/°                                         | 90.00                                             |
| β/°                                         | 90.00                                             |
| γ/°                                         | 90.00                                             |
| Volume/Å <sup>3</sup>                       | 1756.09(19)                                       |
| Z                                           | 4                                                 |
| ρ <sub>calc</sub> /mg/mm <sup>3</sup>       | 1.322                                             |
| m/mm <sup>-1</sup>                          | 0.198                                             |
| F(000)                                      | 736.0                                             |
| Crystal size/mm <sup>3</sup>                | 0.11 × 0.1 × 0.06                                 |
| 2θ range for data collection                | 6.84 to 52.04°                                    |
| Index ranges                                | -12 ≤ h ≤ 12, -7 ≤ k ≤ 9, -28 ≤ l ≤ 14            |
| Reflections collected                       | 4431                                              |
| Independent reflections                     | 2372[R(int) = 0.0480]                             |
| Data/restraints/parameters                  | 2372/1/232                                        |
| Goodness-of-fit on F <sup>2</sup>           | 1.015                                             |
| Final R indexes [I ≥ 2σ (I)]                | R <sub>1</sub> = 0.0492, wR <sub>2</sub> = 0.0806 |
| Final R indexes [all data]                  | R <sub>1</sub> = 0.0771, wR <sub>2</sub> = 0.0940 |
| Largest diff. peak/hole / e Å <sup>-3</sup> | 0.18/-0.26                                        |
| Flack parameter                             | 0.06(12)                                          |

## X-ray Crystallographic data of 3p

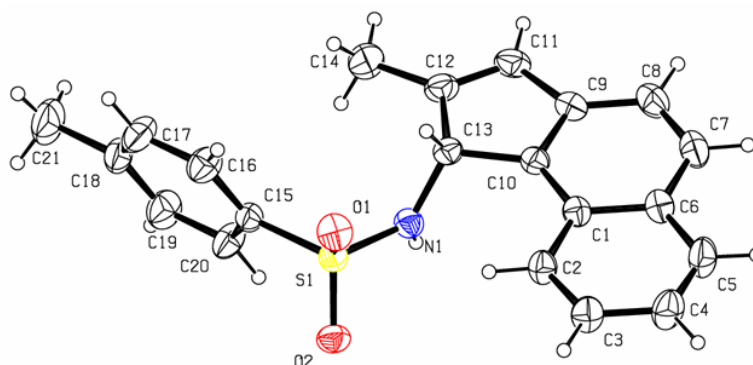

|                                             |                                                   |
|---------------------------------------------|---------------------------------------------------|
| Empirical formula                           | C <sub>21</sub> H <sub>19</sub> NO <sub>2</sub> S |
| Formula weight                              | 349.43                                            |
| Temperature/K                               | 293.80(10)                                        |
| Crystal system                              | triclinic                                         |
| Space group                                 | P-1                                               |
| a/Å                                         | 8.5924(14)                                        |
| b/Å                                         | 10.4758(18)                                       |
| c/Å                                         | 10.797(2)                                         |
| α/°                                         | 97.496(15)                                        |
| β/°                                         | 111.360(17)                                       |
| γ/°                                         | 90.383(14)                                        |
| Volume/Å <sup>3</sup>                       | 895.8(3)                                          |
| Z                                           | 2                                                 |
| ρ <sub>calc</sub> /mg/mm <sup>3</sup>       | 1.295                                             |
| m/mm <sup>-1</sup>                          | 0.194                                             |
| F(000)                                      | 368.0                                             |
| Crystal size/mm <sup>3</sup>                | 0.36 × 0.34 × 0.28                                |
| 2θ range for data collection                | 6.38 to 52.02°                                    |
| Index ranges                                | -10 ≤ h ≤ 10, -12 ≤ k ≤ 12, -13 ≤ l ≤ 12          |
| Reflections collected                       | 5643                                              |
| Independent reflections                     | 3519[R(int) = 0.0255]                             |
| Data/restraints/parameters                  | 3519/42/232                                       |
| Goodness-of-fit on F <sup>2</sup>           | 1.104                                             |
| Final R indexes [I ≥ 2σ(I)]                 | R <sub>1</sub> = 0.0566, wR <sub>2</sub> = 0.1392 |
| Final R indexes [all data]                  | R <sub>1</sub> = 0.0780, wR <sub>2</sub> = 0.1524 |
| Largest diff. peak/hole / e Å <sup>-3</sup> | 0.35/-0.35                                        |

## References

1. W. B. Jennings, C. J. Lovely, *Tetrahedron Lett.*, 1988, **29**, 3725.
2. (a) C. Gignoux, A. F. Newton, A. Barthelme, W. Lewis, M. -L. Alcarazb, R. A. Stockman, *Org. Biomol. Chem.*, 2012, **10**, 67; (b) S. Pachali, C. Hofmann, G. Rapp, R. Schobert, A. Baro, W. Frey, S. Laschat, *Eur. J. Org. Chem.*, 2009, **17**, 2828; (c) K. Ando, *J. Org. Chem.*, 1998, **63**, 8411.
3. M. Larsson, H. -E. Högberg, *Tetrahedron* 2001, **57**, 7541.
4. P. Bharathi, M. Periasamy, *Org. Lett.*, 1999, **1**, 857.
5. J. Mo, X, K. Chen, Y, R. Chi, *J. Am. Chem. Soc.*, 2012, **134**, 8810.
6. M. T. Barry, M. S. Steven, *J. Am. Chem. Soc.*, 2012, **134**, 494.
7. E. S. Erica, S. Richmond, *J. Am. Chem. Soc.*, 2013, **135**, 4696.
8. J. Biao, C.-G. Yang, J. Wang, *J. Org. Chem.*, 2001, **66**, 4865.
9. M. Bongjin, H. Sangbae, Y. Yeojin, K. Hyejin, *Org. Lett.*, 2005, **7**, 1031.
10. M. Bellassoued, A. Majidi, *J. Org. Chem.*, 1993, **58**, 2517.

# <sup>1</sup>H and <sup>13</sup>C NMR Spectra

## <sup>1</sup>H NMR

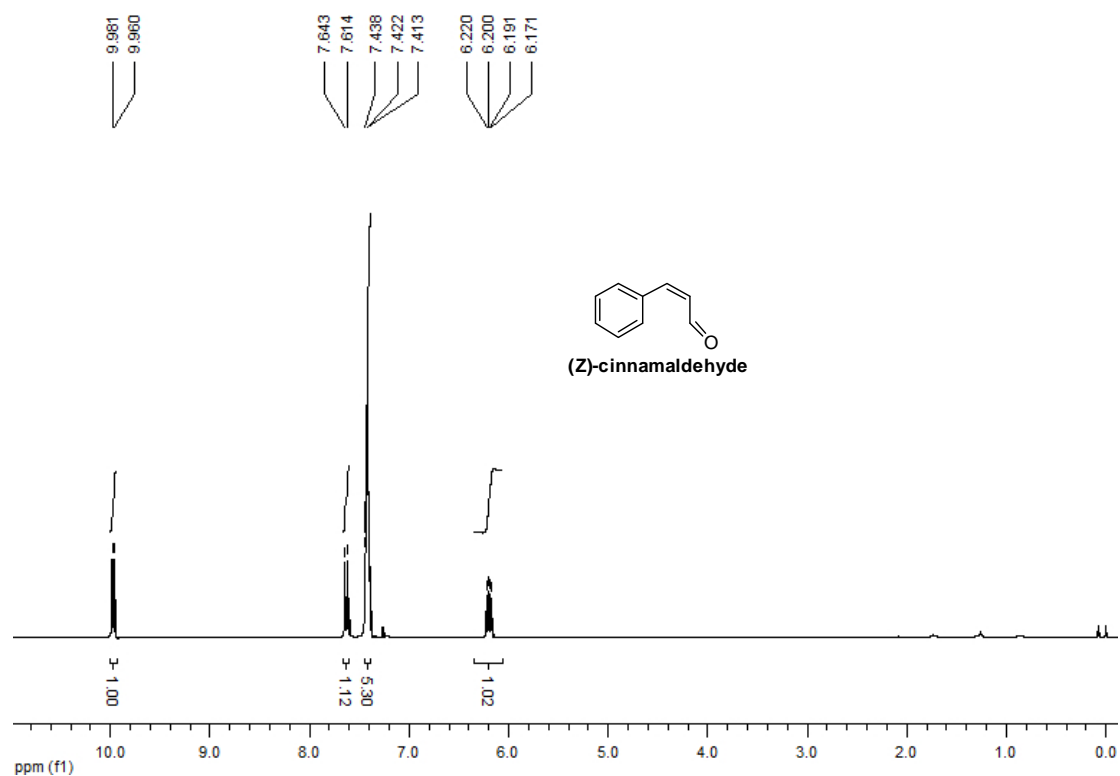

## <sup>1</sup>H NMR

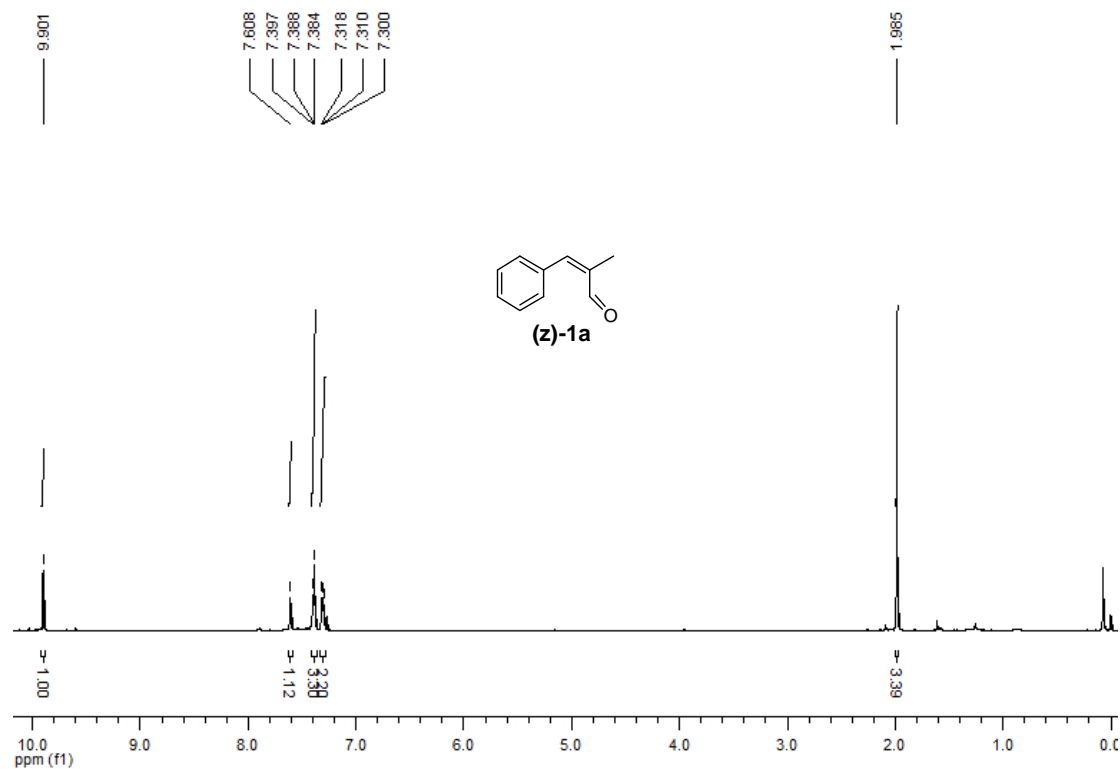



**$^1\text{H}$  NMR**

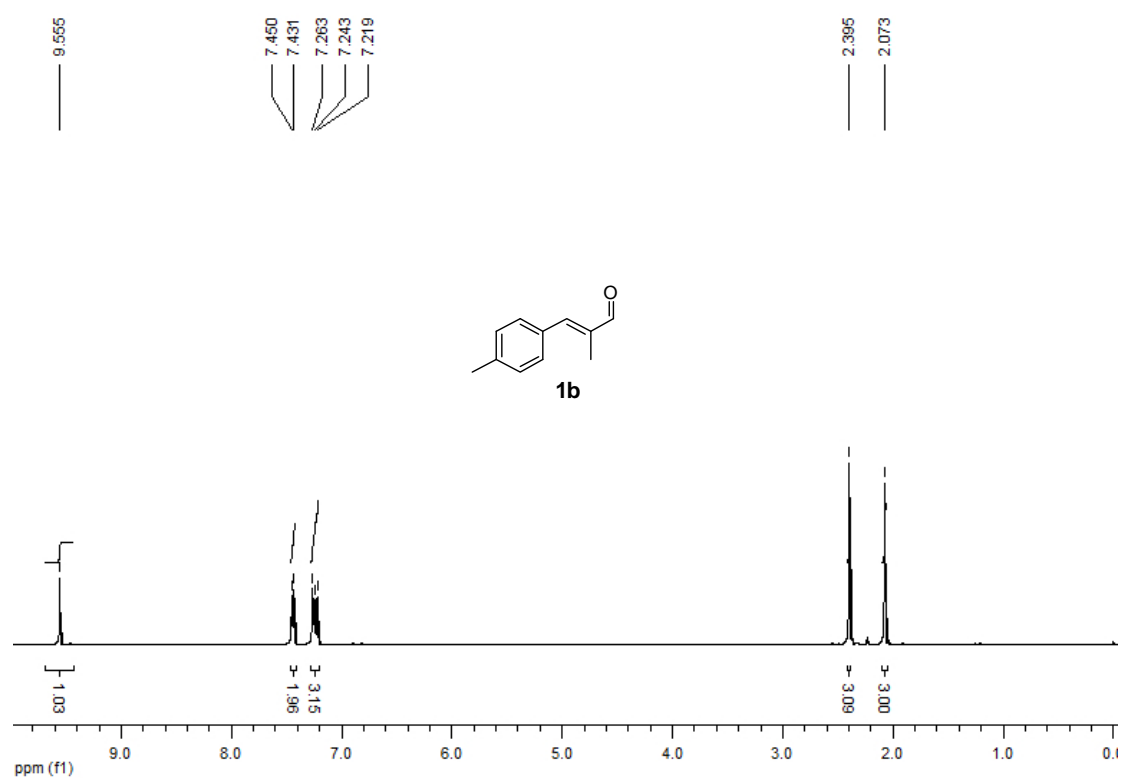

**$^1\text{H}$  NMR**

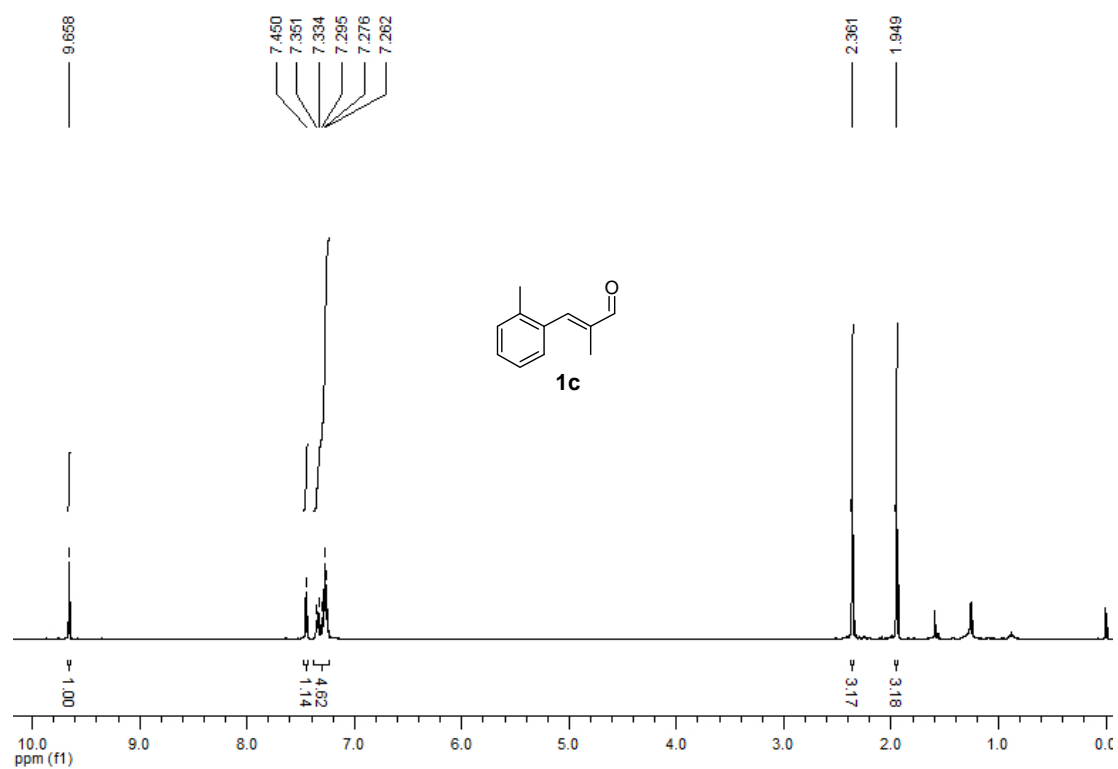

# <sup>1</sup>H NMR

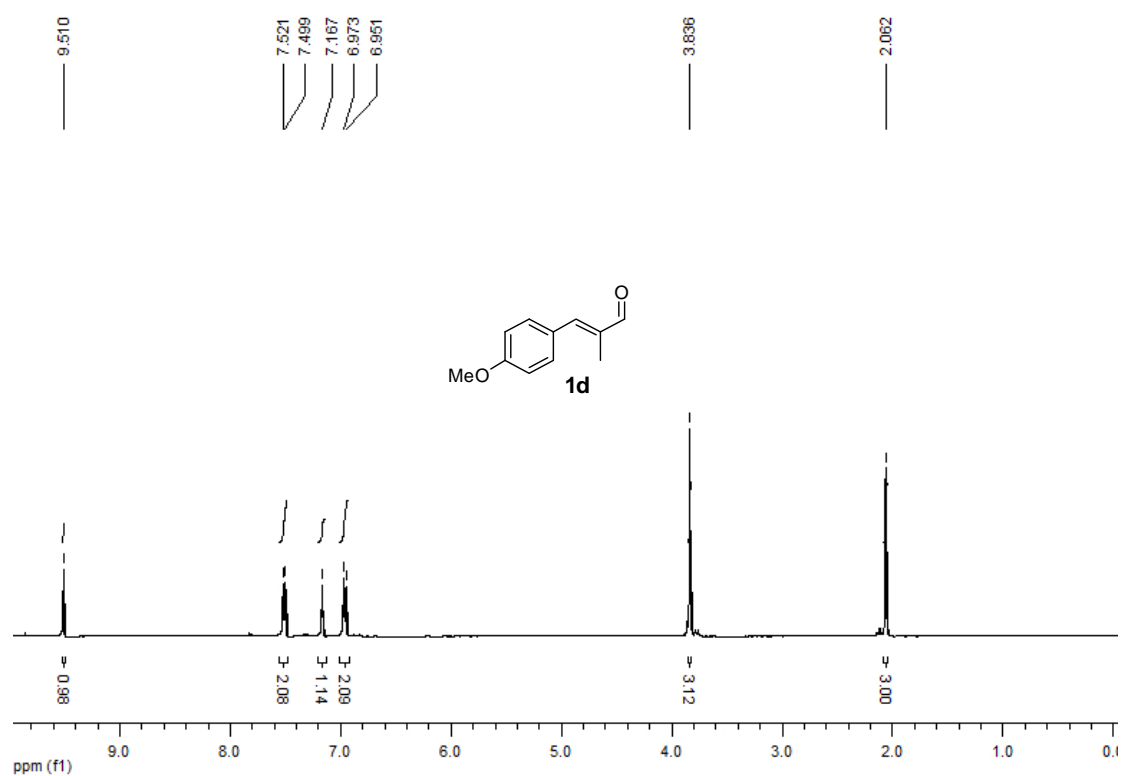

# <sup>1</sup>H NMR

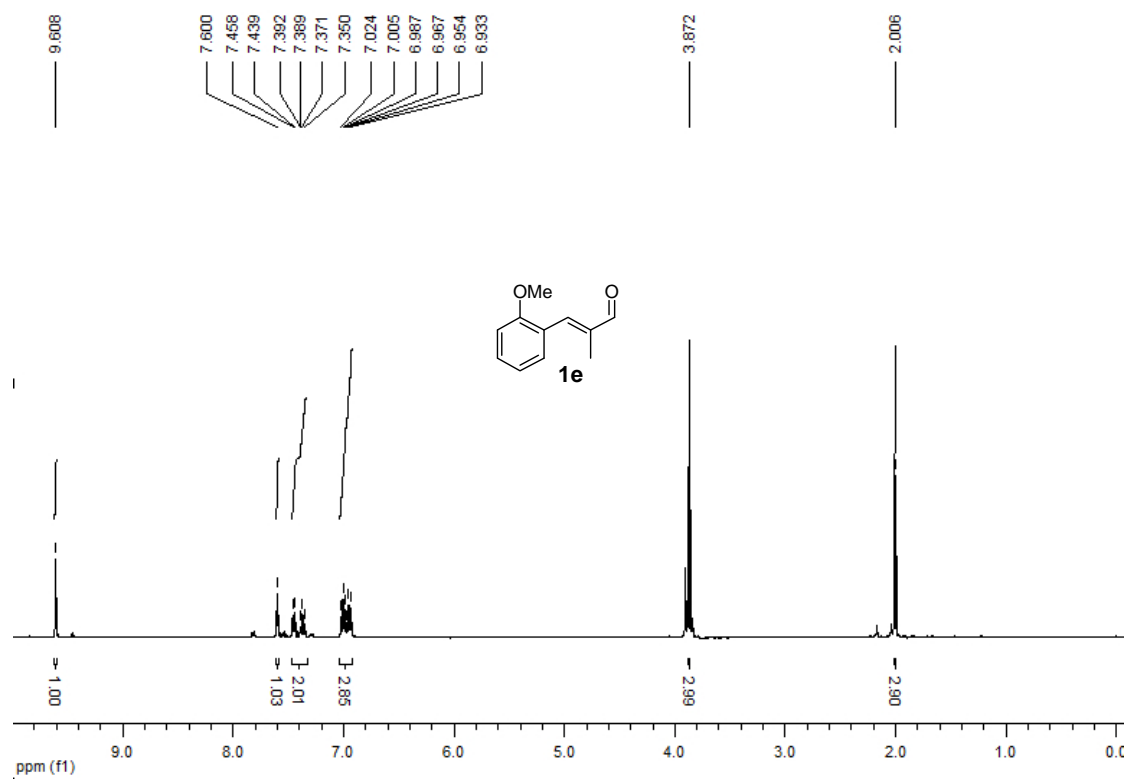

Chemical structure of **1g** is shown above the spectrum.

<sup>1</sup>H NMR spectrum (CDCl<sub>3</sub>) of compound **1g**. The x-axis represents the chemical shift in ppm (f1), ranging from 0.0 to 10.0. The spectrum shows several peaks, with the following chemical shifts (ppm) labeled above the peaks:

- 9.658
- 7.463
- 7.445
- 7.427
- 7.348
- 7.330
- 7.312
- 7.273
- 7.256
- 7.247
- 7.228
- 7.176
- 7.157
- 6.891
- 6.872
- 6.853
- 3.709
- 3.690

Integration values are shown below the spectrum:

- 1.36 (for the aldehyde peak at 9.658 ppm)
- 4.44 (for the aromatic region between 6.8 and 7.5 ppm)
- 1.32 (for the methylene doublet at 3.690 and 3.709 ppm)
- 3.00 (for the methylene singlet at 3.690 and 3.709 ppm)

Chemical structure of **1h**: CCCCC/C=C/c1ccccc1C=O

<sup>1</sup>H NMR spectrum (CDCl<sub>3</sub>) data:

| Chemical Shift (ppm)                                          | Integration |
|---------------------------------------------------------------|-------------|
| 9.550                                                         | ~1.00       |
| 7.514, 7.511, 7.493, 7.489, 7.452, 7.433, 7.413, 7.399, 7.210 | ~5.05       |
| 6.600                                                         | ~1.03       |
| 2.547, 2.528, 2.507                                           | ~2.30       |
| 1.530, 1.513, 1.493, 1.474, 1.467, 1.455                      | ~4.83       |
| 1.395, 1.376, 1.361, 1.309, 1.299, 1.291                      | ~4.72       |
| 0.800                                                         | ~3.05       |

# <sup>1</sup>H NMR

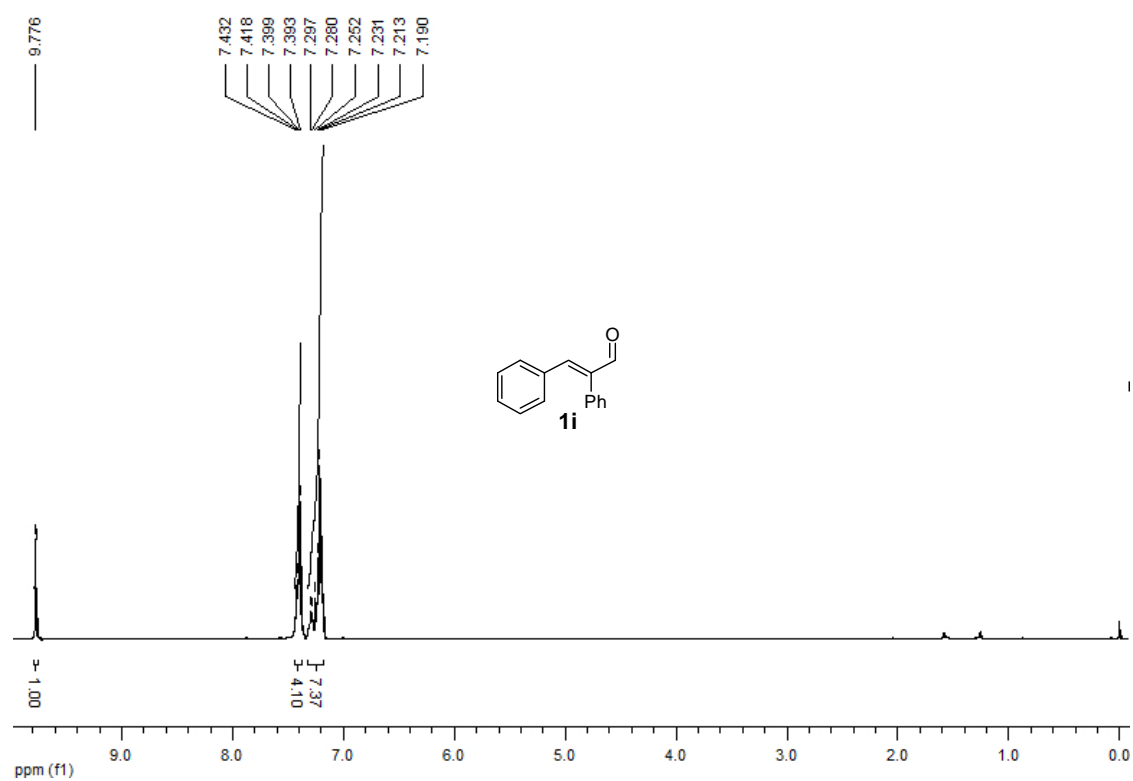

# <sup>1</sup>H NMR

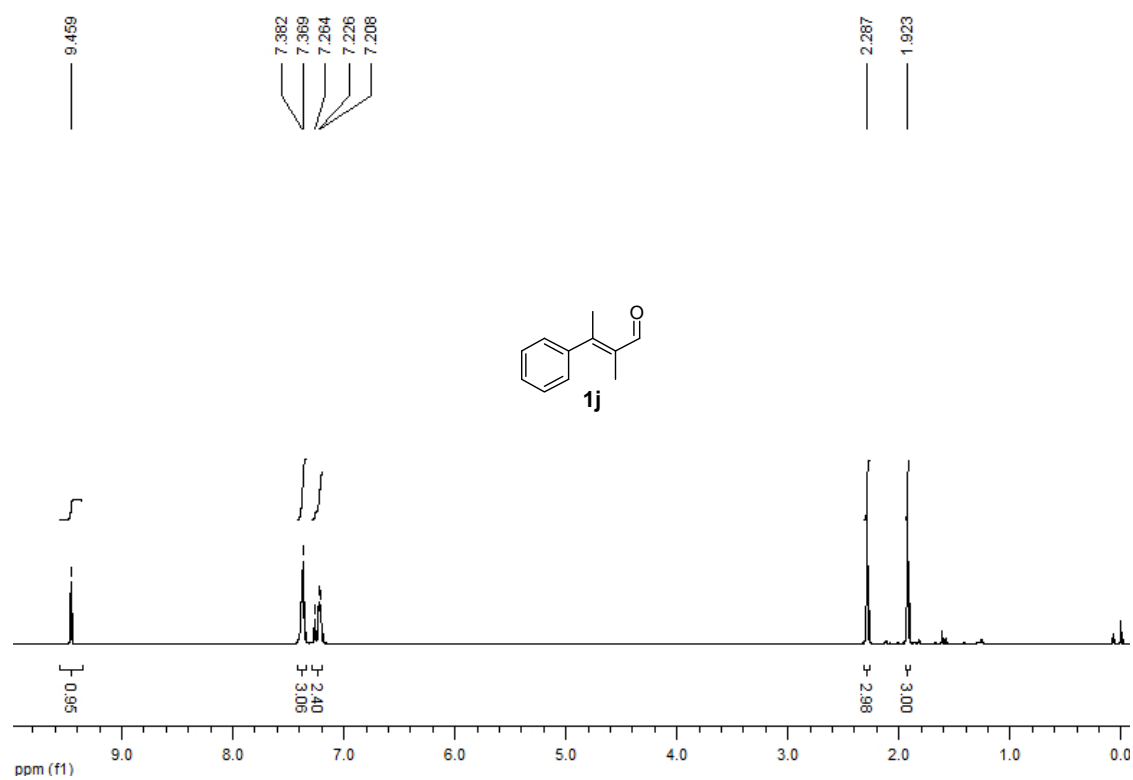

# <sup>1</sup>H NMR

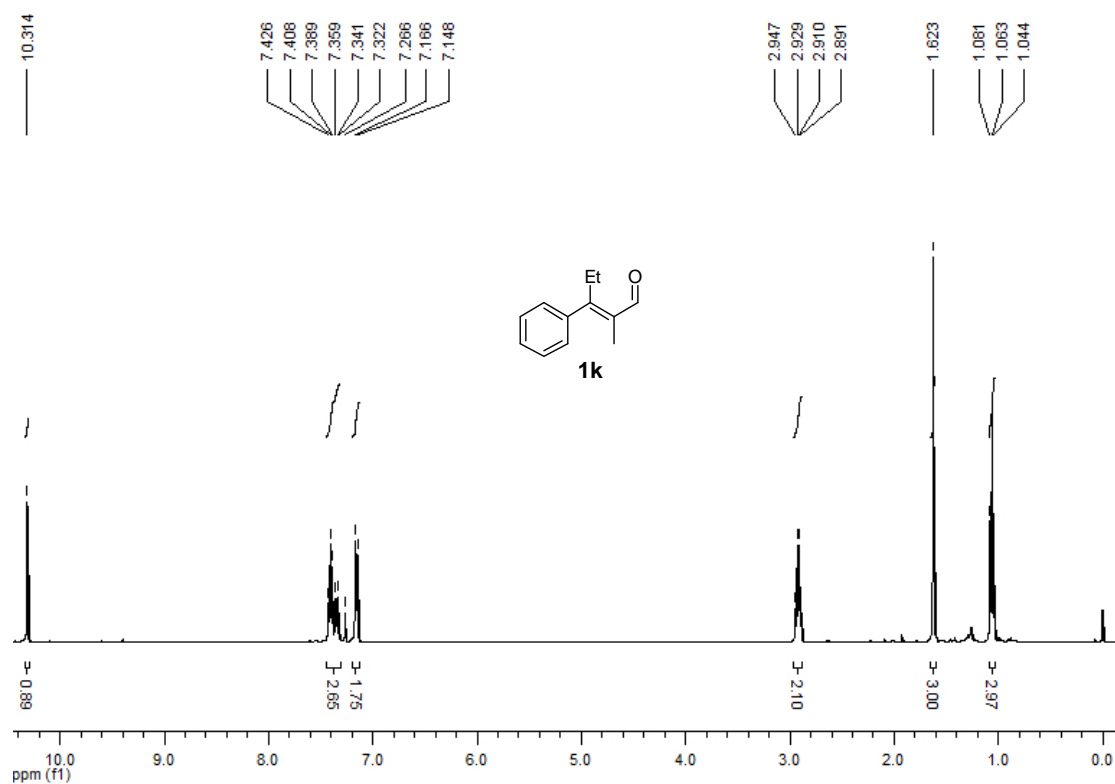

# <sup>1</sup>H NMR

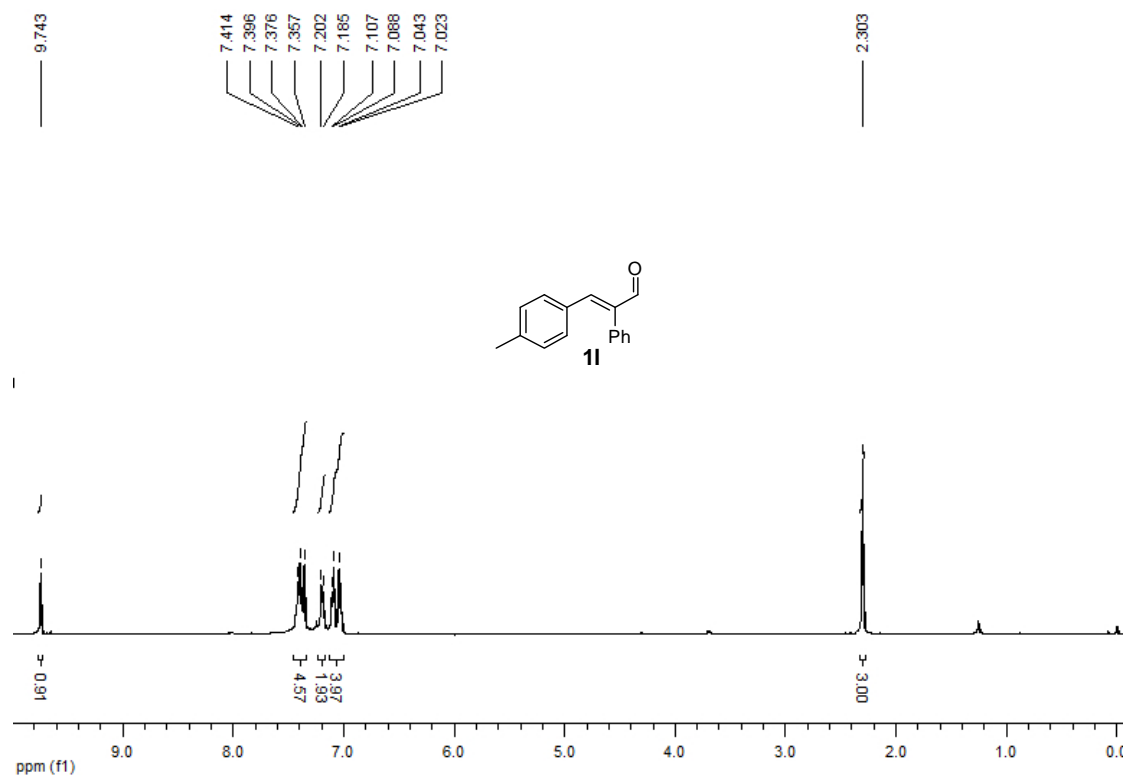

# <sup>1</sup>H NMR

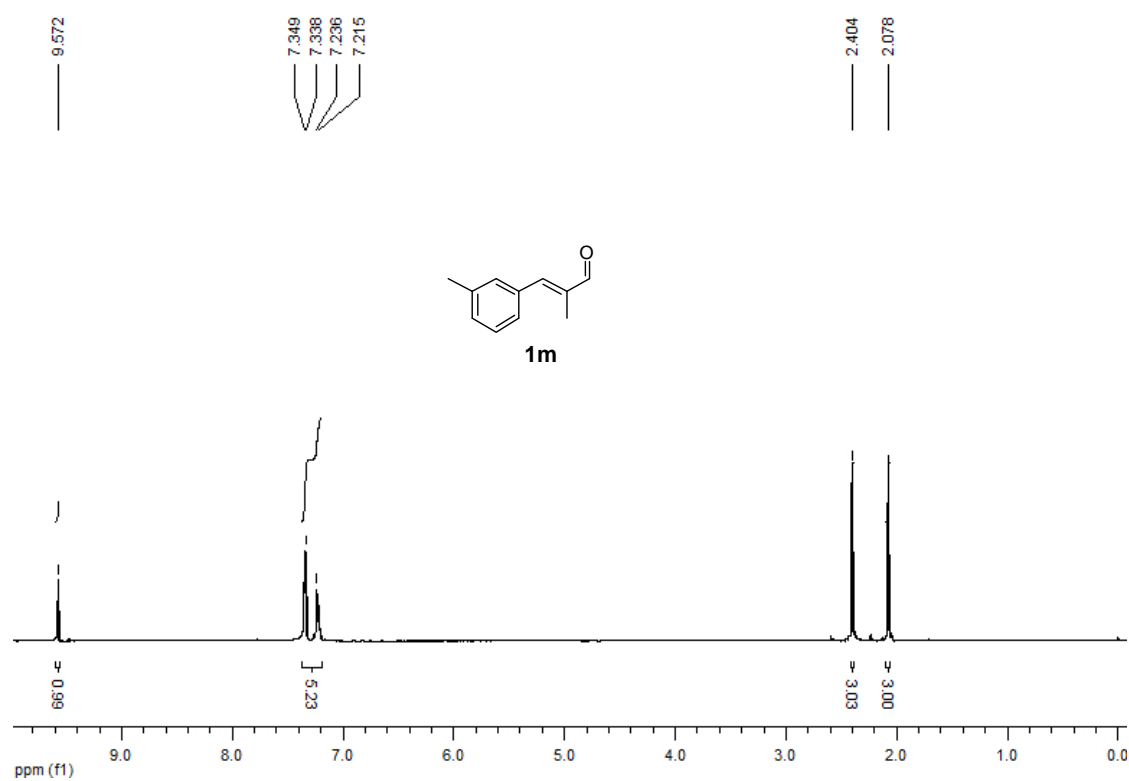

# <sup>1</sup>H NMR

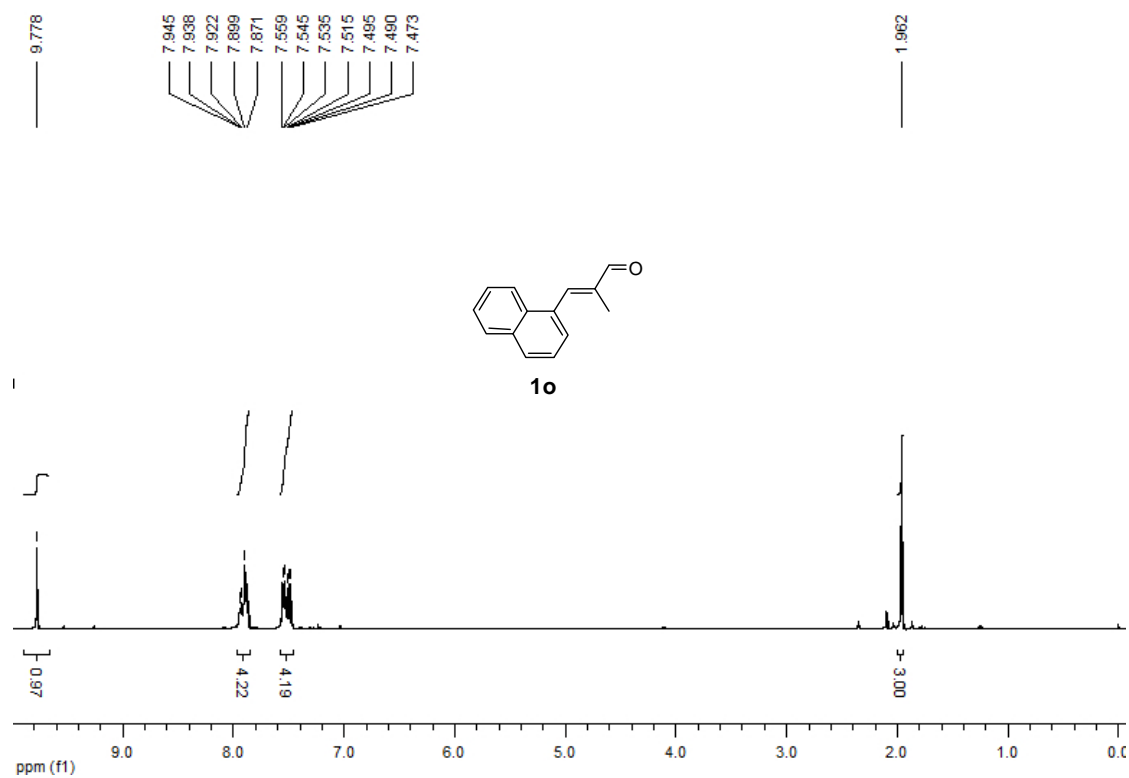

# <sup>1</sup>H NMR

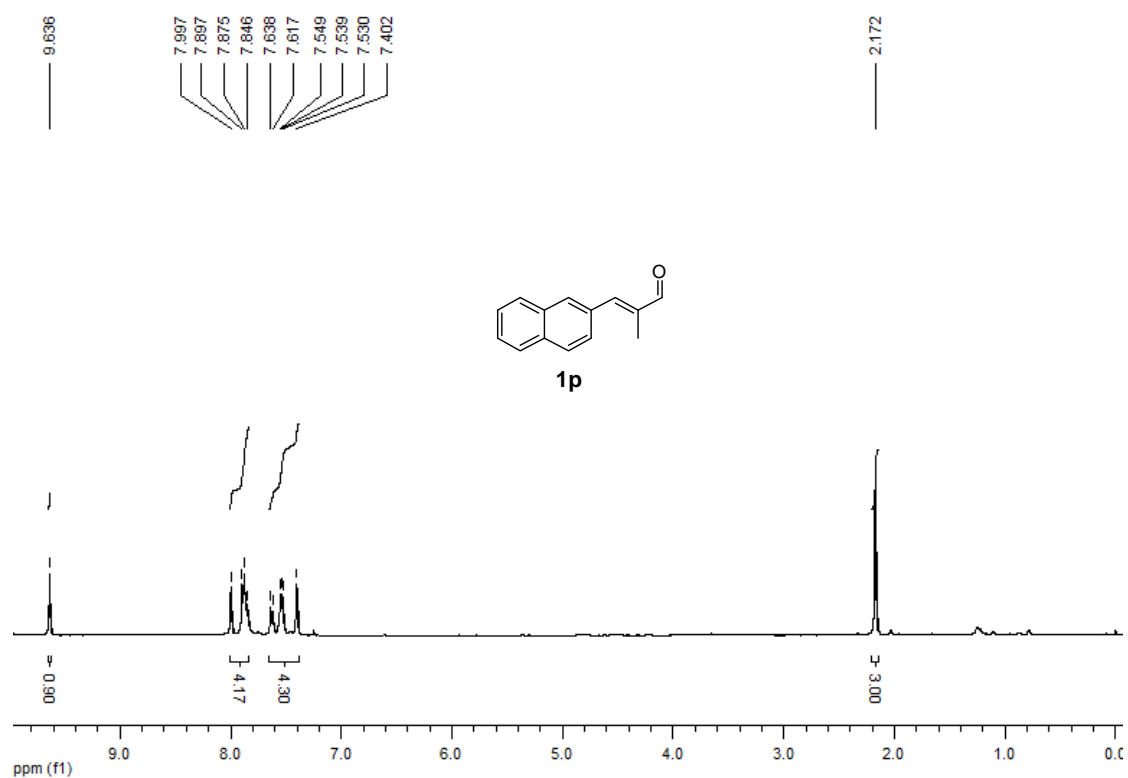

# <sup>1</sup>H NMR

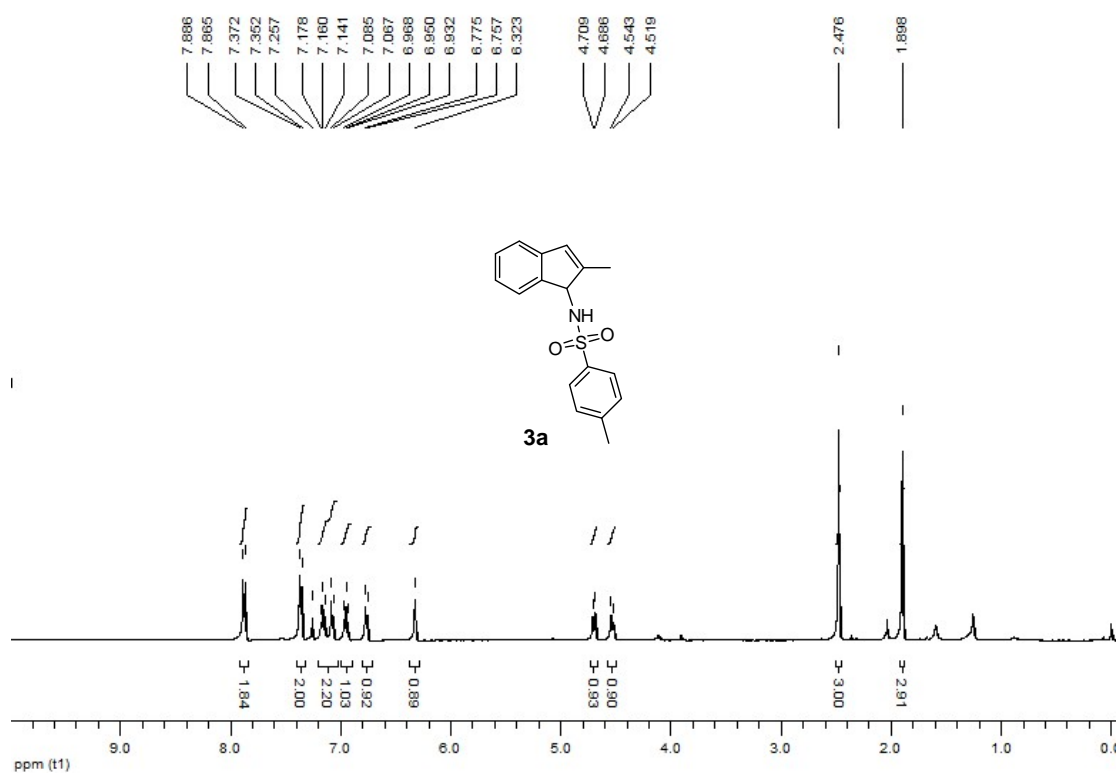

# <sup>13</sup>C NMR

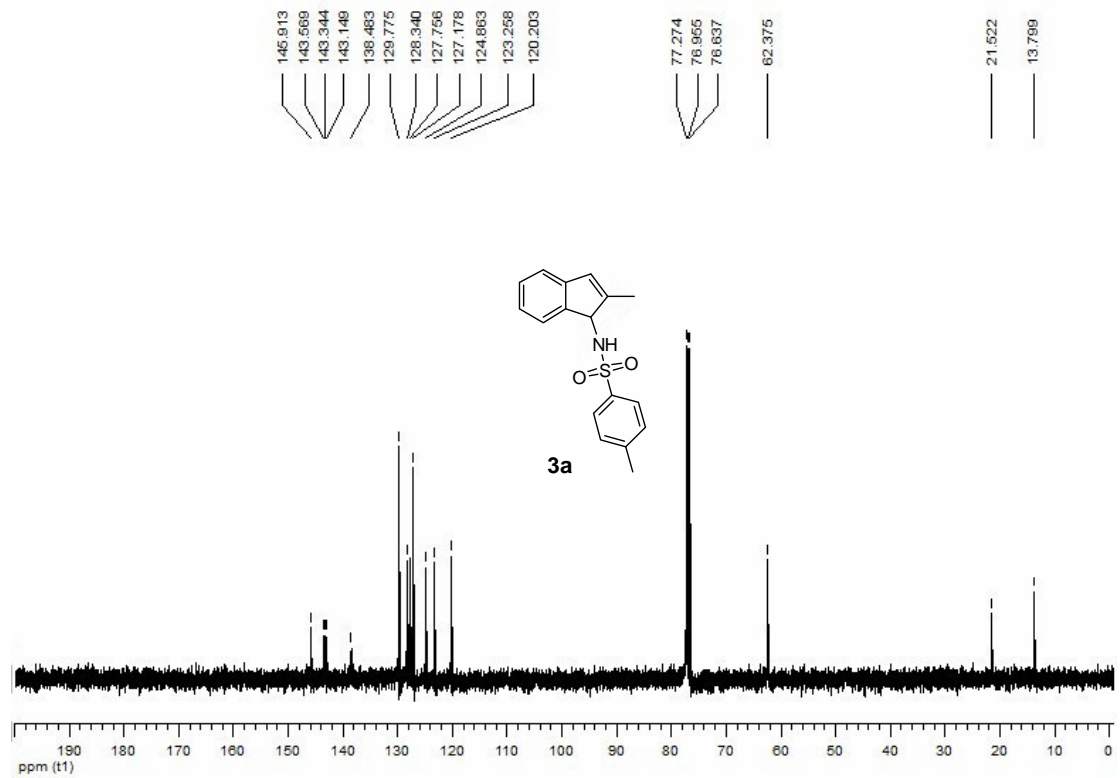



# <sup>1</sup>H NMR

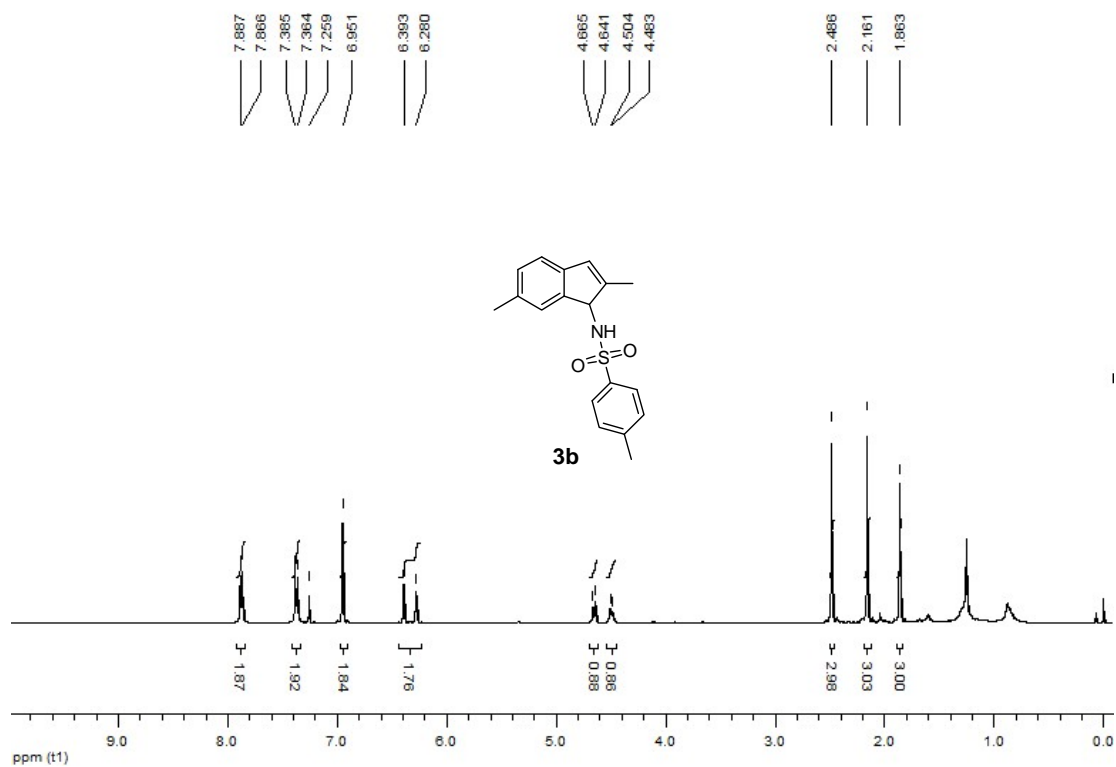

# <sup>13</sup>C NMR

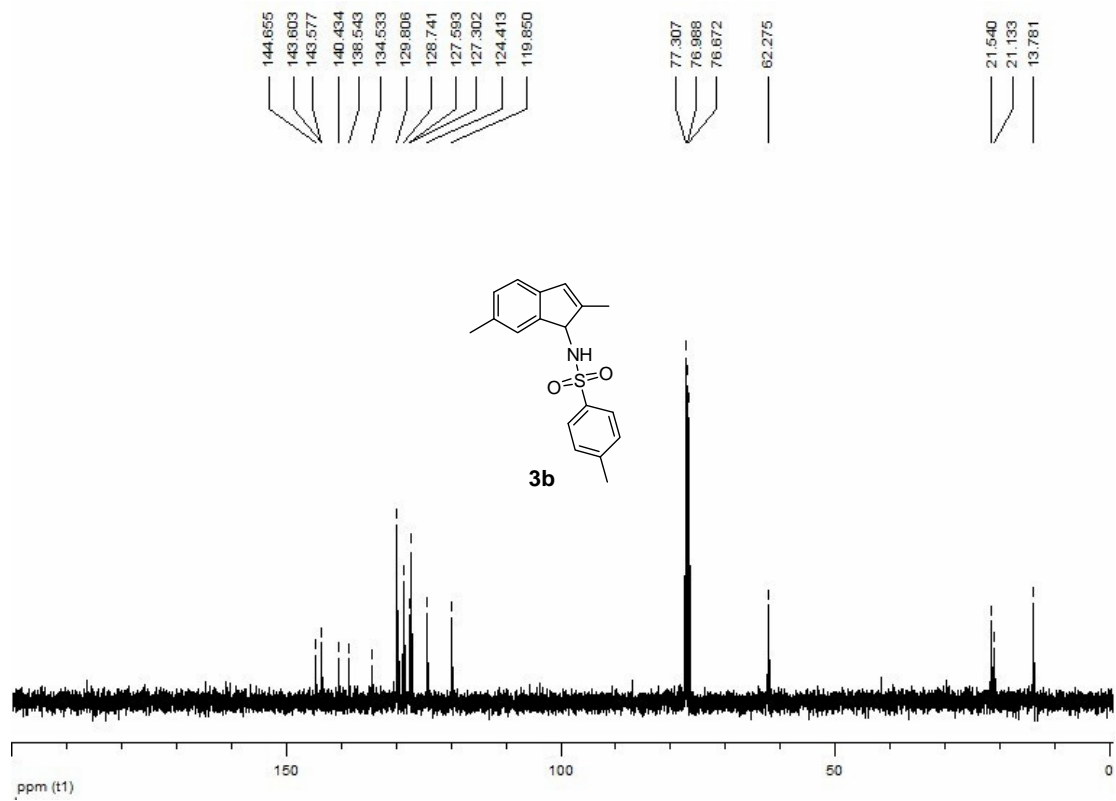

# <sup>1</sup>H NMR

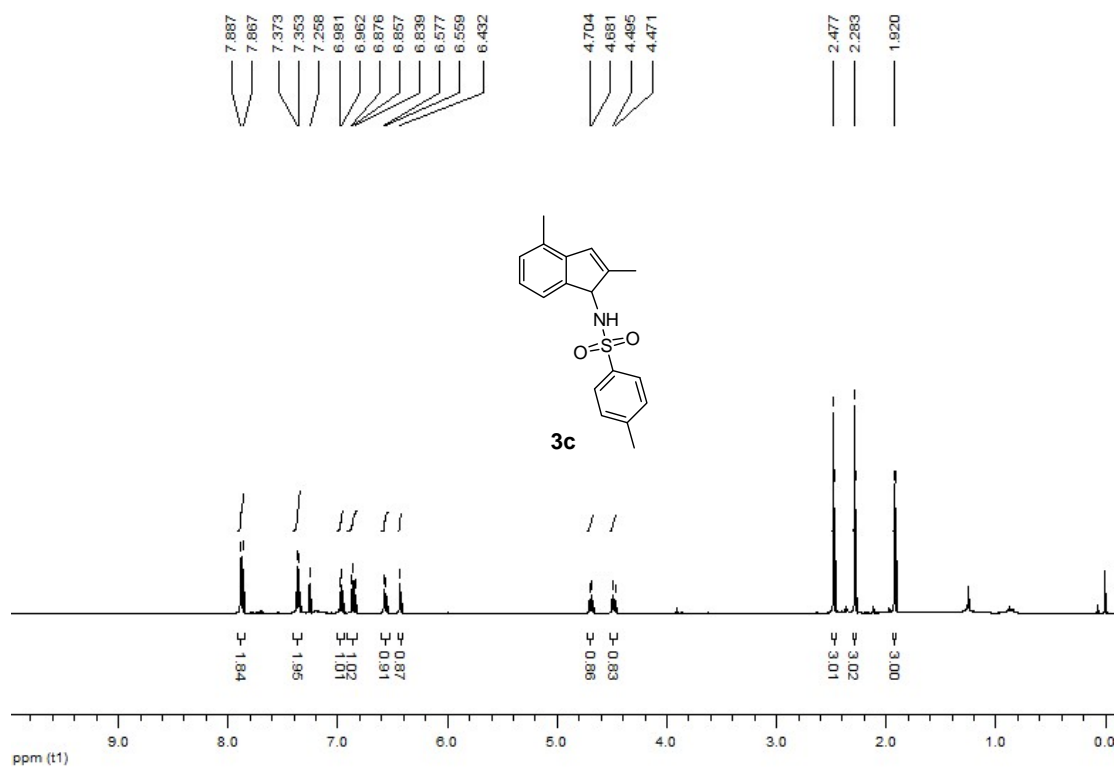

# <sup>13</sup>C NMR

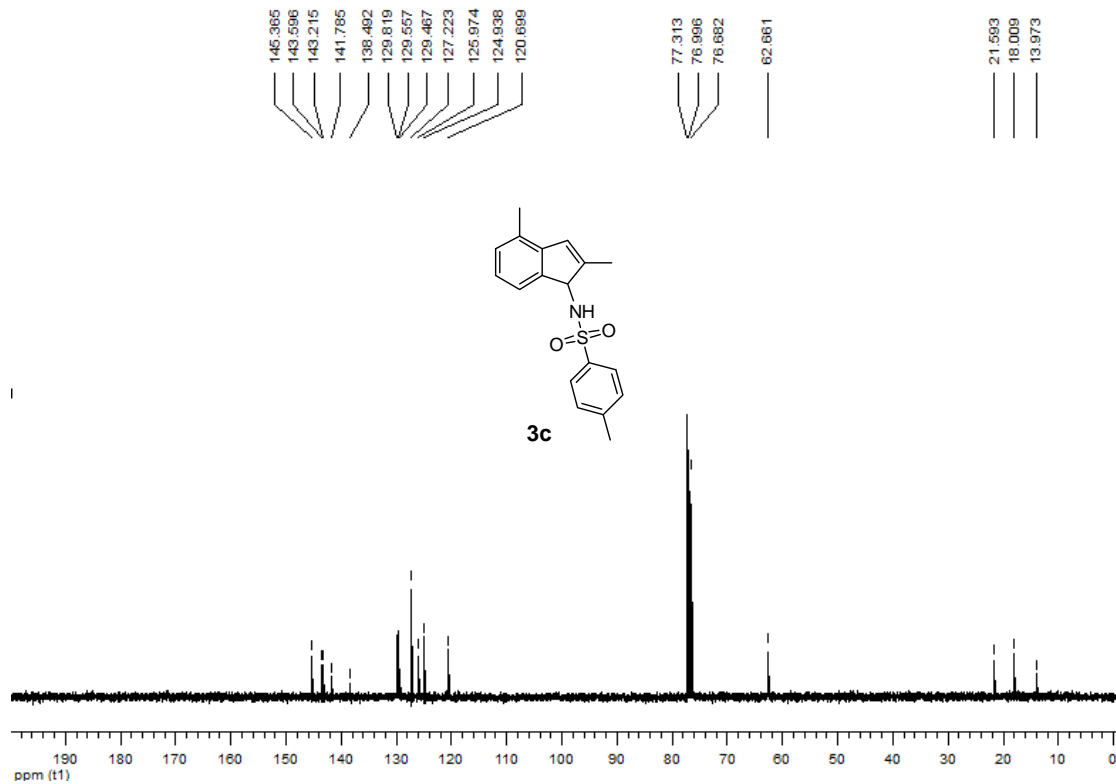

# <sup>1</sup>H NMR

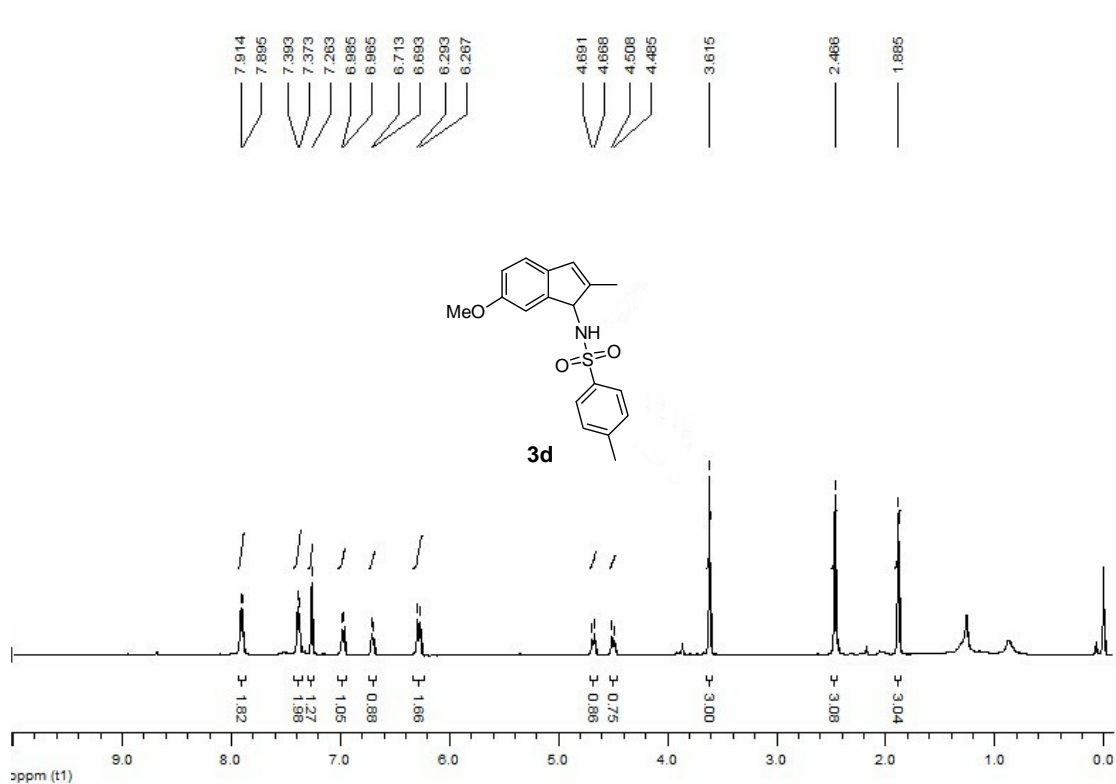

# <sup>13</sup>C NMR

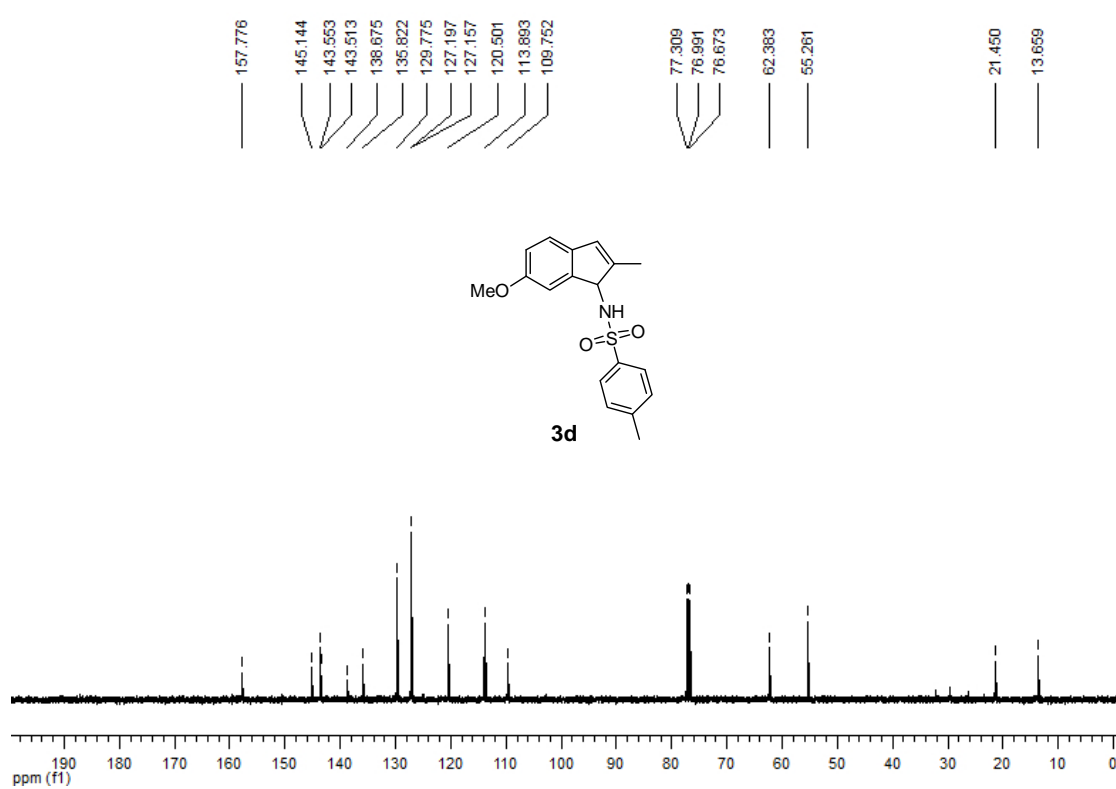

# <sup>1</sup>H NMR

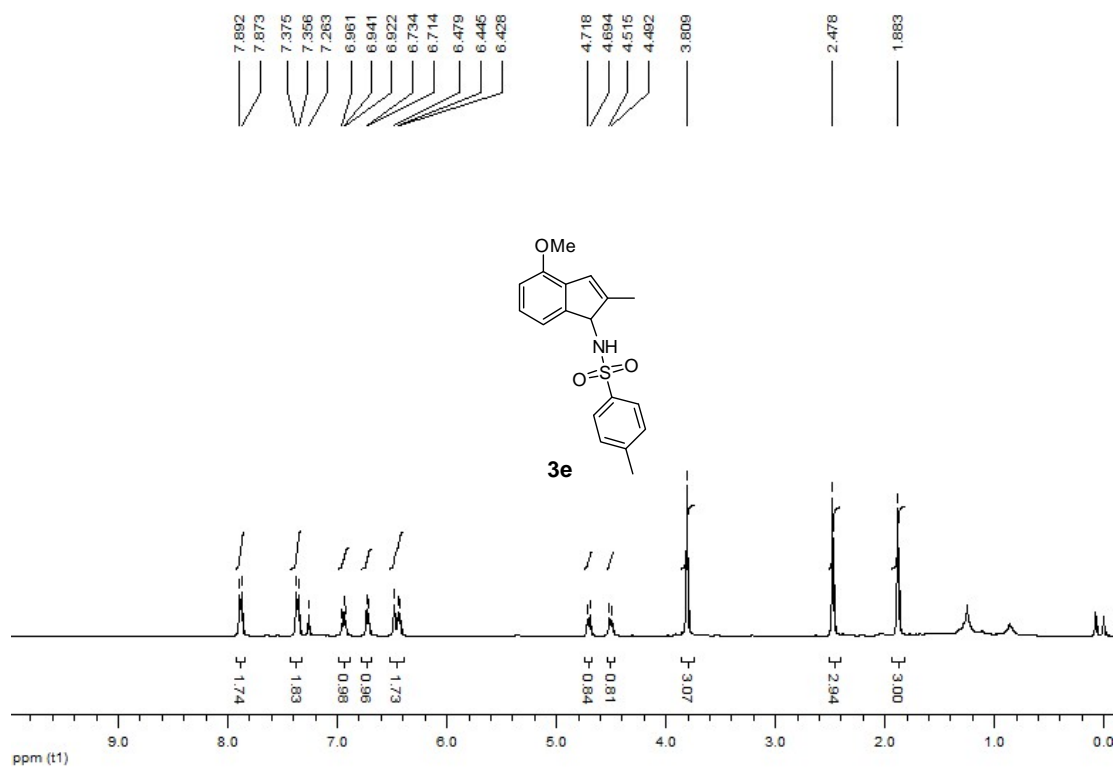

# <sup>13</sup>C NMR

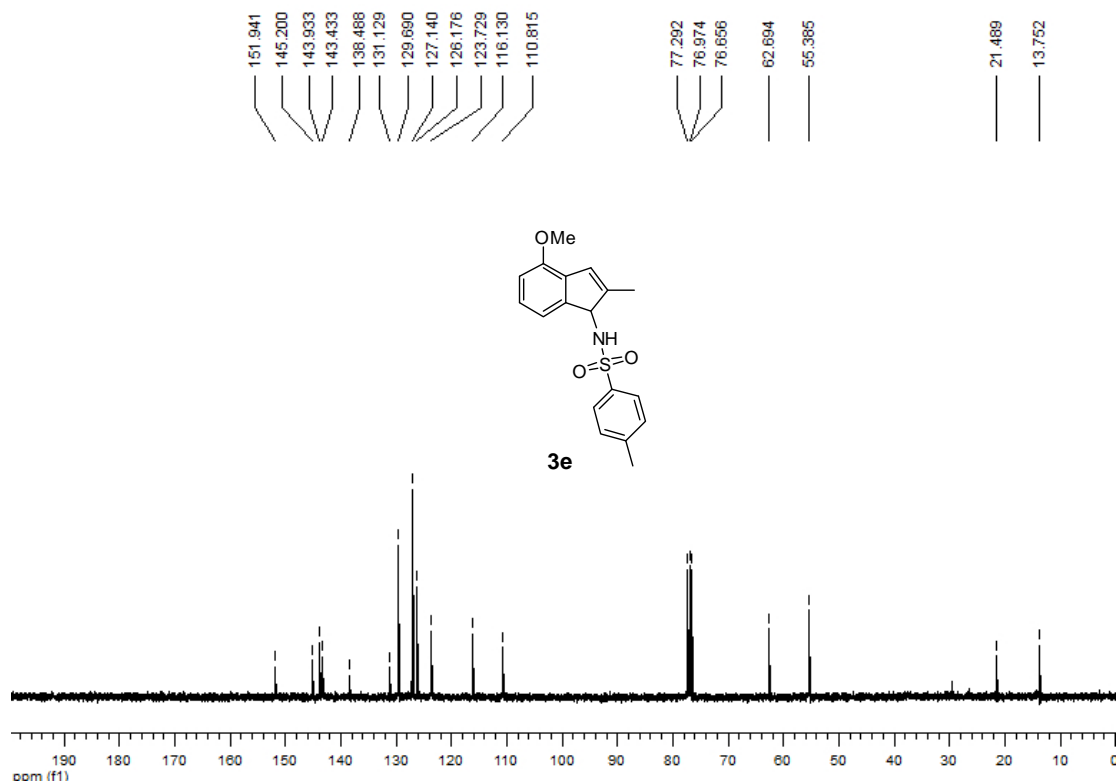

Chemical structure of **3f** is shown above the spectrum. The spectrum displays peaks corresponding to the structure, with the following chemical shifts (ppm) labeled above the peaks:

7.912, 7.892, 7.865, 7.423, 7.388, 7.368, 7.337, 7.320, 7.311, 7.292, 7.261, 7.240, 7.222, 6.085, 5.057, 5.034, 4.597, 4.573, 2.478

The x-axis is labeled "ppm (t1)" and ranges from 0.0 to 9.0.

**3f**

Cc1ccc(cc1)S(=O)(=O)Nc2c3ccccc3c(c2)c4ccccc4

146.105  
144.208  
143.670  
141.866  
138.008  
134.408  
130.952  
129.852  
128.603  
128.342  
128.319  
127.474  
127.259  
126.418  
124.131  
120.829  
77.301  
76.983  
76.666  
59.426  
21.535

ppm (f1)

Cc1ccc(cc1)S(=O)(=O)Nc2c(c3ccccc3c2)c4ccccc4  
**3g**

7.834, 7.814, 7.349, 7.329, 7.321, 7.255, 7.234, 7.218, 7.199, 7.107, 7.076, 7.057, 7.039, 7.013, 6.995, 6.976, 5.455, 5.433, 4.471, 4.448, 2.496, 2.396

2.05, 3.07, 3.93, 4.27, 1.05, 0.88, 3.08, 3.08, 3.08

ppm (f1)

Chemical structure of **3g** is shown above the spectrum.

<sup>13</sup>C NMR peaks (ppm): 145.866, 144.348, 143.884, 141.088, 138.762, 133.672, 130.842, 130.035, 128.777, 128.009, 127.746, 127.234, 127.101, 126.572, 122.343, 77.575, 77.257, 76.940, 60.054, 21.849, 18.369.

Chemical structure of **3h** is shown above the spectrum. The spectrum displays peaks corresponding to the structure, with chemical shifts (ppm) labeled above the peaks and integration values below the peaks.

Chemical shifts (ppm) labeled above the peaks:

- 7.873, 7.853, 7.358, 7.338, 7.253, 7.176, 7.157, 7.139, 7.088, 7.070, 6.980, 6.961, 6.943, 6.870, 6.851, 6.313, 4.752, 4.728, 4.553, 4.539, 2.468, 2.249, 2.230, 2.210, 2.190, 2.143, 2.125, 2.106, 2.084, 1.373, 1.273, 1.254, 1.229, 0.905, 0.888, 0.870

Integration values labeled below the peaks:

- 1.86, 1.88, 0.92, 0.90, 0.88, 0.86, 0.91, 0.94, 3.00, 2.00, 1.76, 6.33, 2.65

Chemical structure of **3h** is shown above the spectrum. The structure is 1-(4-methylphenyl)sulfonyl-2-(4-oxopentyl)indole.

CC1=CC=C(C=C1)S(=O)(=O)N2C(=C(C=C3C=CC=CC23)C(=O)CCCC3=O)C4=CC=CC=C4

The spectrum displays the following chemical shifts (ppm):

- 150.595, 143.518, 143.402, 143.020, 138.521, 129.743, 128.311, 127.232, 126.825, 124.916, 123.513, 120.272
- 77.287, 76.965, 76.831
- 61.245
- 31.569, 29.074, 28.175, 27.913, 22.579, 21.490, 14.034

The spectrum shows a complex pattern of peaks in the aromatic region (120-150 ppm), a triplet for the solvent (CDCl<sub>3</sub>) at 77 ppm, a singlet for the methoxy group at 61 ppm, and a series of peaks in the aliphatic region (14-32 ppm) corresponding to the pentyl chain and the methyl group on the phenyl ring.

# <sup>1</sup>H NMR

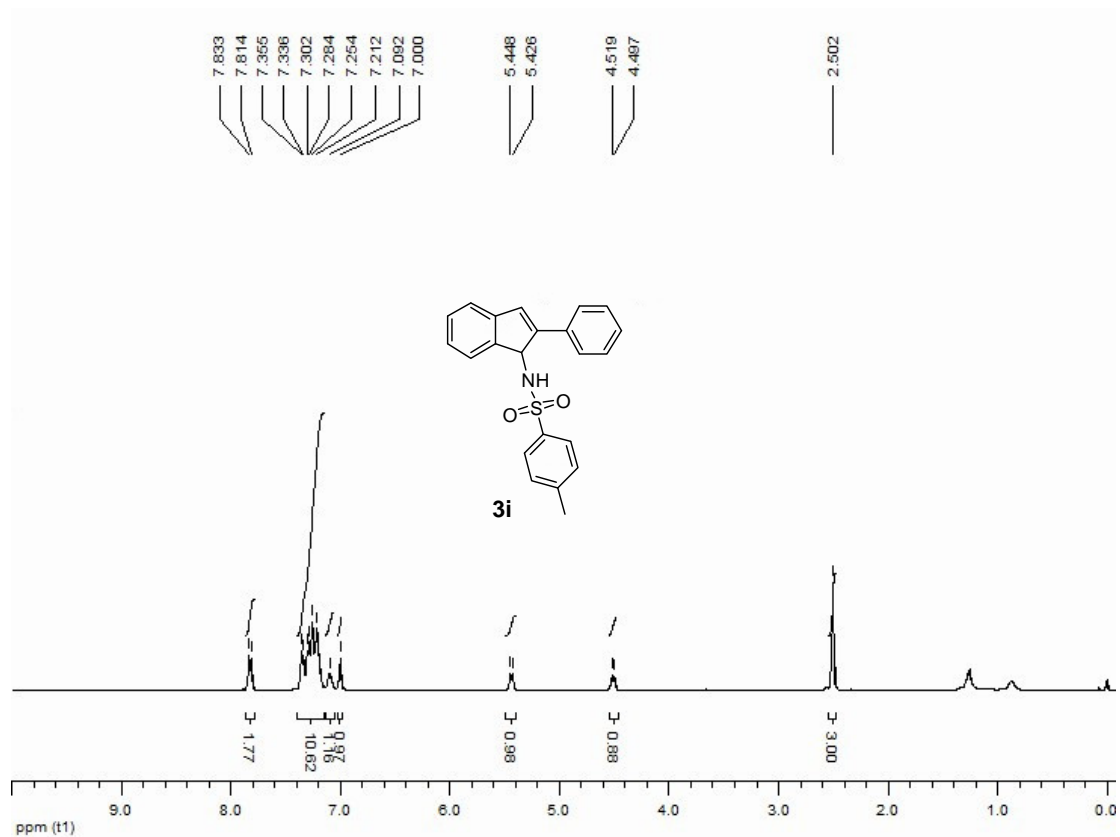

# <sup>13</sup>C NMR

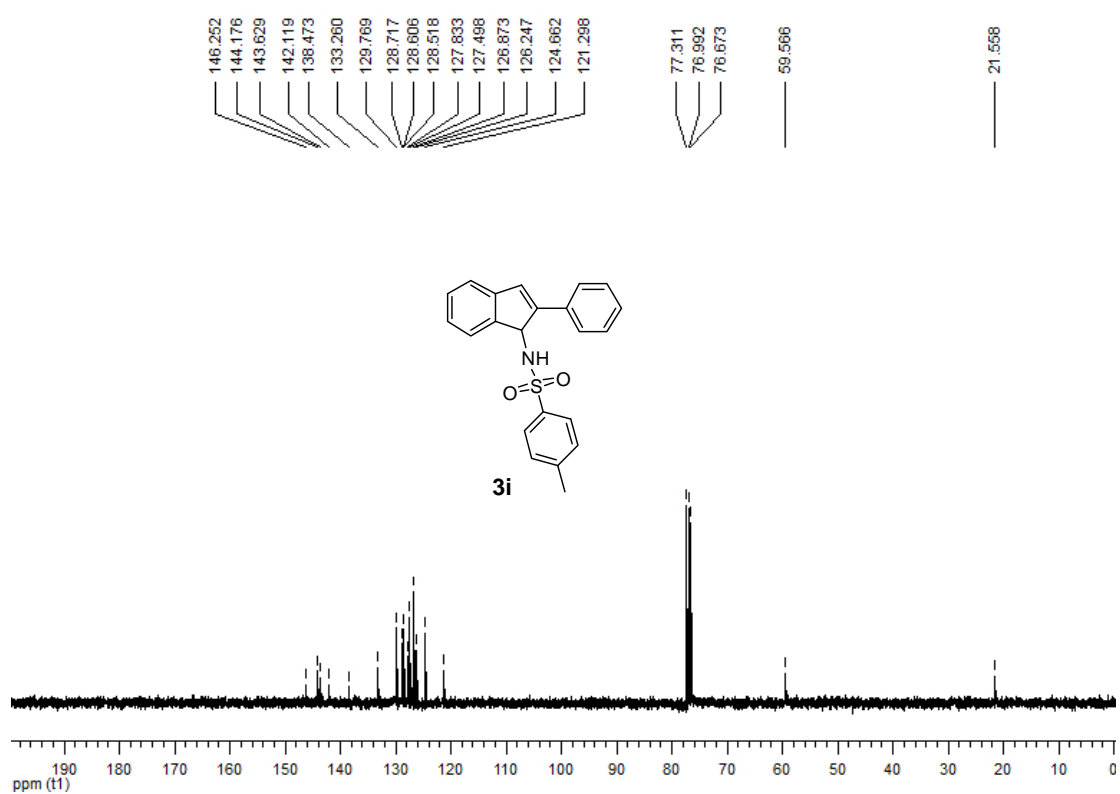



# <sup>1</sup>H NMR

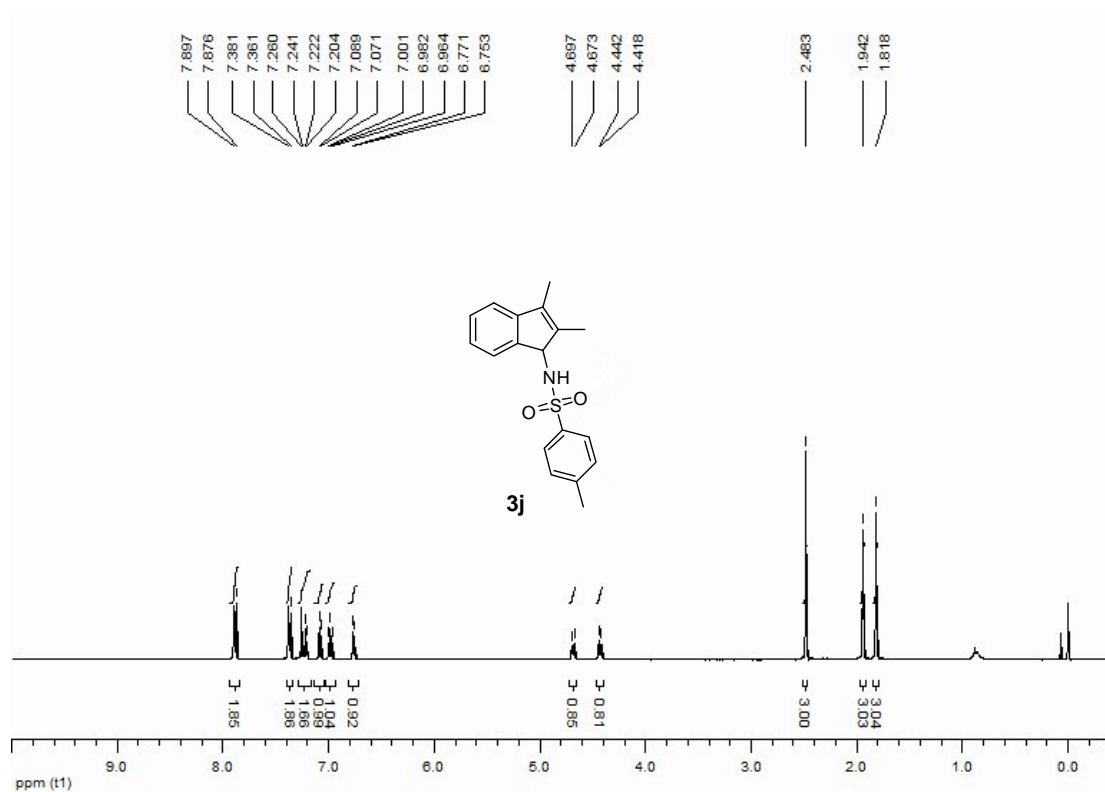

# <sup>13</sup>C NMR

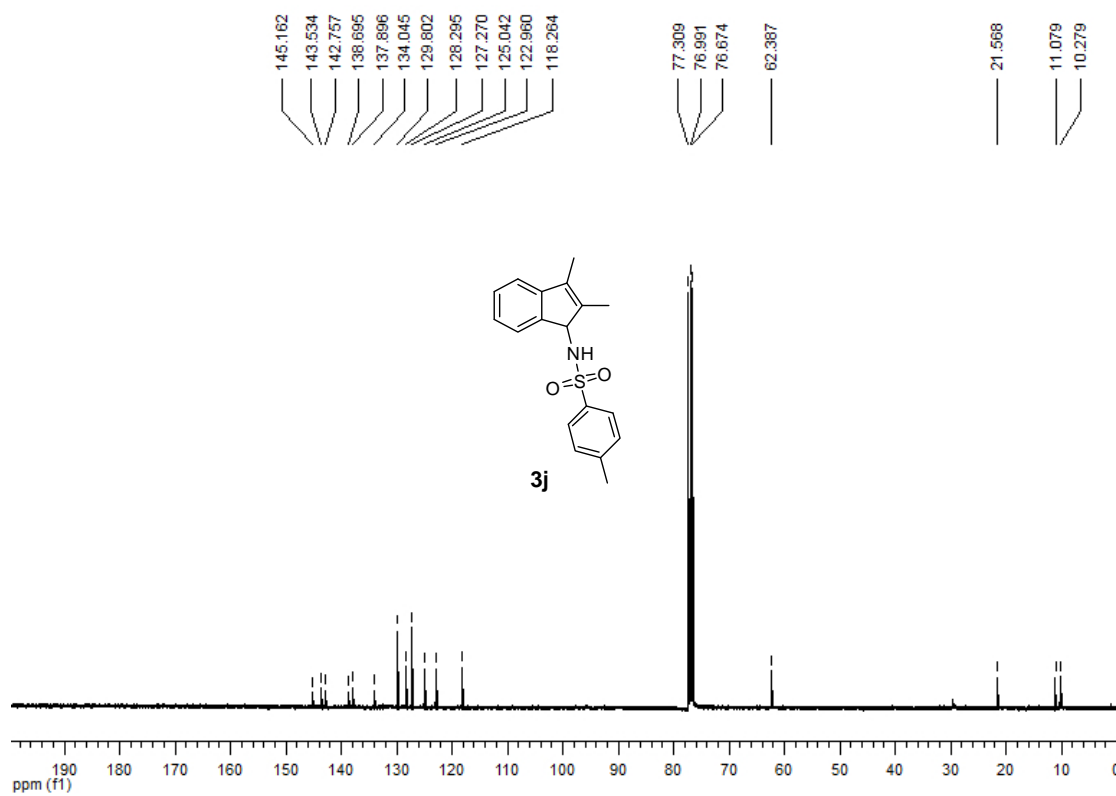

# <sup>1</sup>H NMR

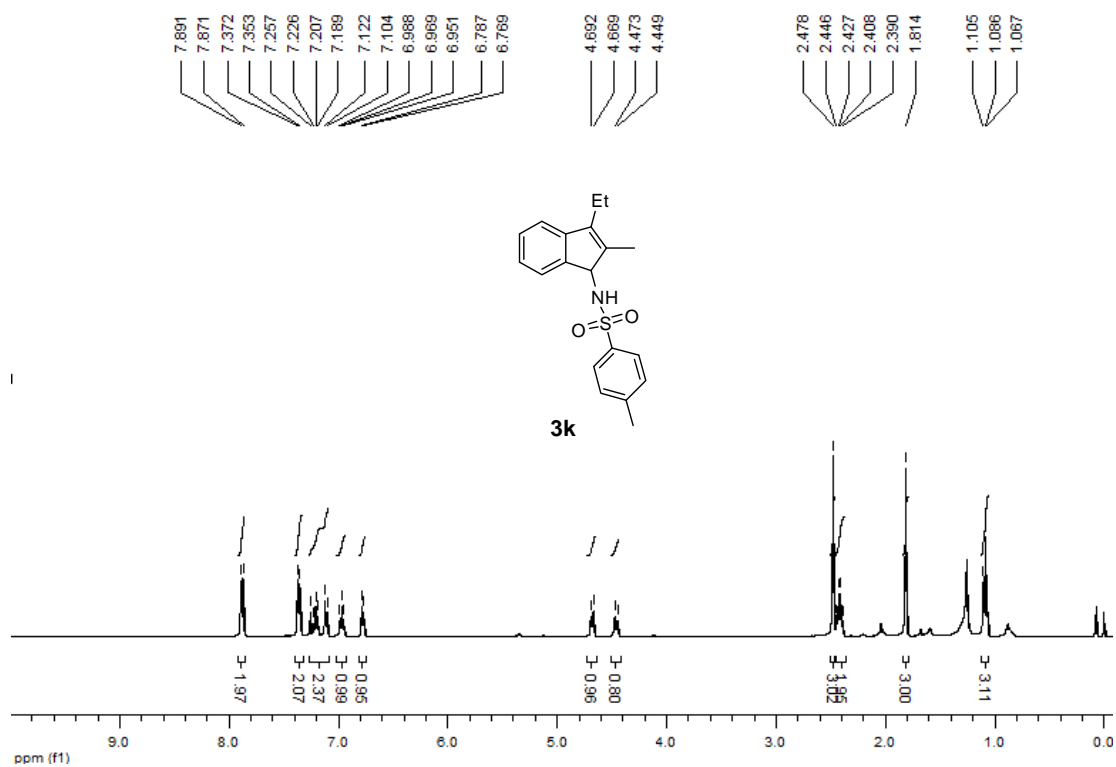

# <sup>13</sup>C NMR

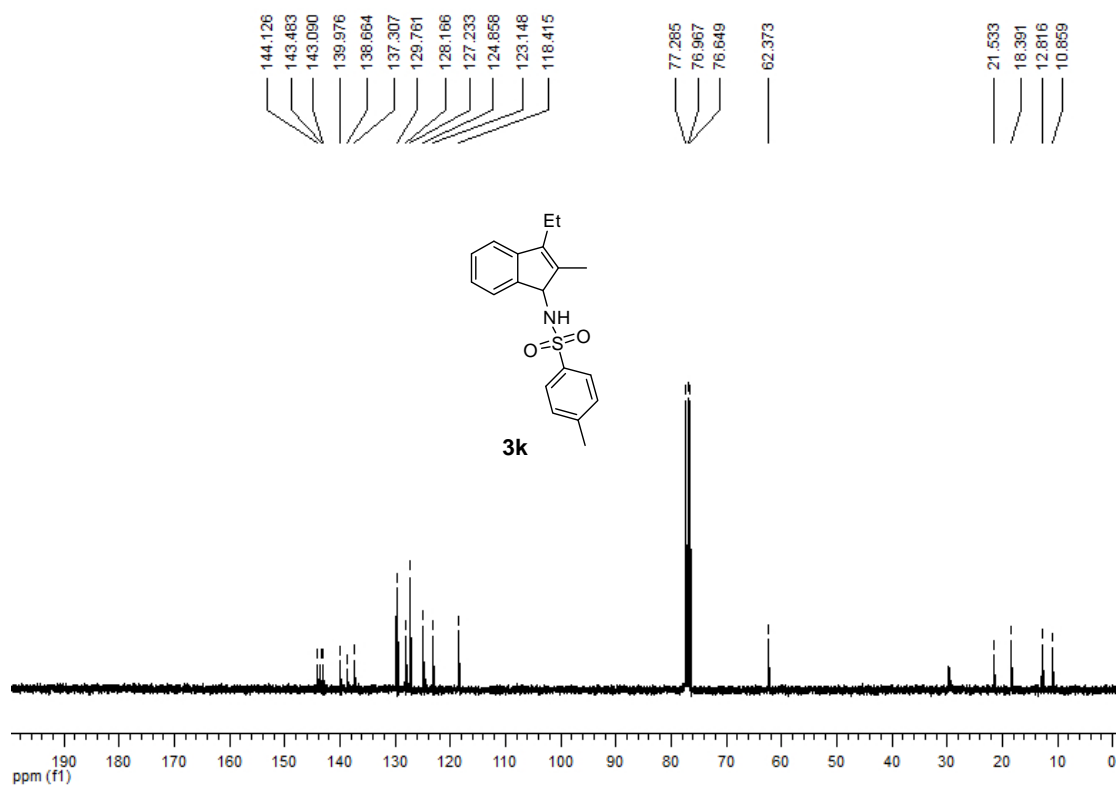

Chemical structure of **3l** is shown above the spectrum. The spectrum displays peaks corresponding to the structure, with chemical shifts (ppm) labeled above the peaks and integration values below the peaks.

Chemical shifts (ppm) labeled above the peaks:

- 7.848, 7.828, 7.367, 7.356, 7.348, 7.338, 7.263, 7.224, 7.221, 7.211, 7.130, 7.111, 7.048, 7.029, 6.966, 6.716, 5.411, 5.388, 4.487, 4.473, 2.506, 2.211

Integration values labeled below the peaks:

- 2.07, 4.17, 0.99, 0.99, 0.99, 0.95, 1.08, 0.92, 3.02, 3.00

Chemical structure of **3I** is shown above the spectrum.

<sup>13</sup>C NMR spectrum (CDCl<sub>3</sub>) of compound **3I**. The x-axis represents chemical shift in ppm (f1), ranging from 0 to 190. The spectrum shows several peaks corresponding to the structure of **3I**.

Chemical structure of **3I** is shown above the spectrum.

Peak list (ppm):

| Chemical Shift (ppm) |
|----------------------|
| 145.267              |
| 144.331              |
| 143.696              |
| 139.489              |
| 138.719              |
| 136.109              |
| 133.398              |
| 129.845              |
| 129.118              |
| 128.550              |
| 127.880              |
| 127.615              |
| 126.774              |
| 125.536              |
| 120.998              |
| 77.345               |
| 77.028               |
| 76.710               |
| 59.479               |
| 21.578               |
| 21.374               |

# <sup>1</sup>H NMR

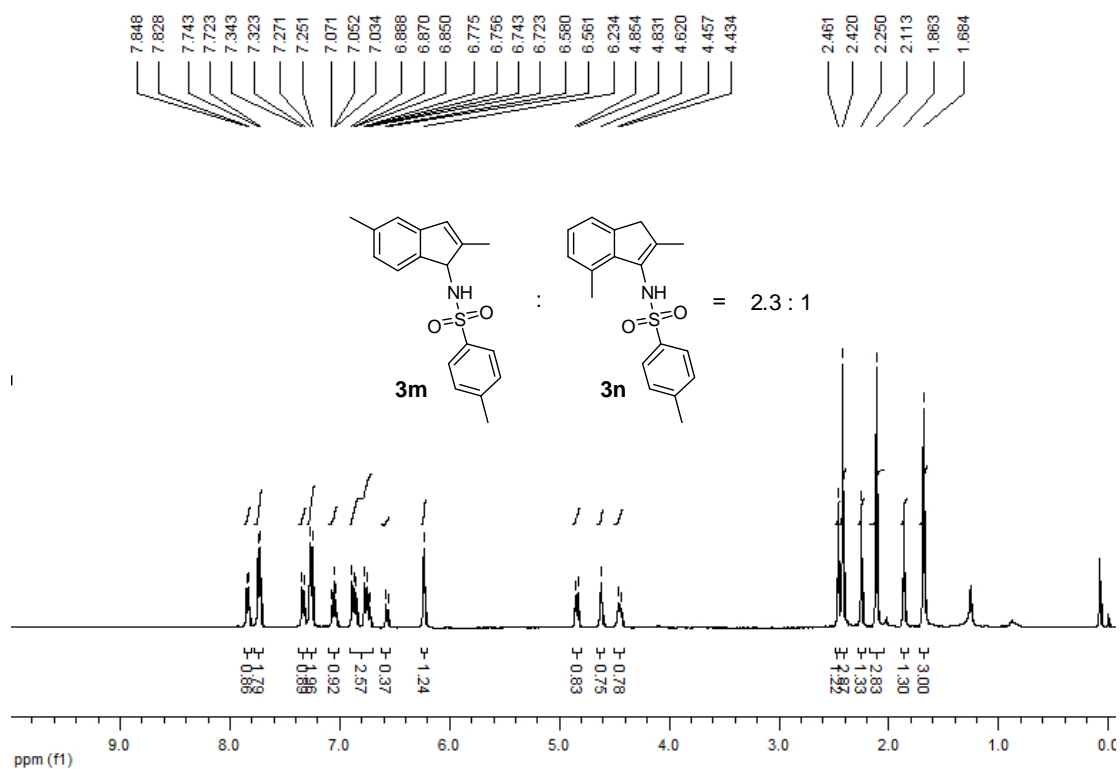

# <sup>13</sup>C NMR

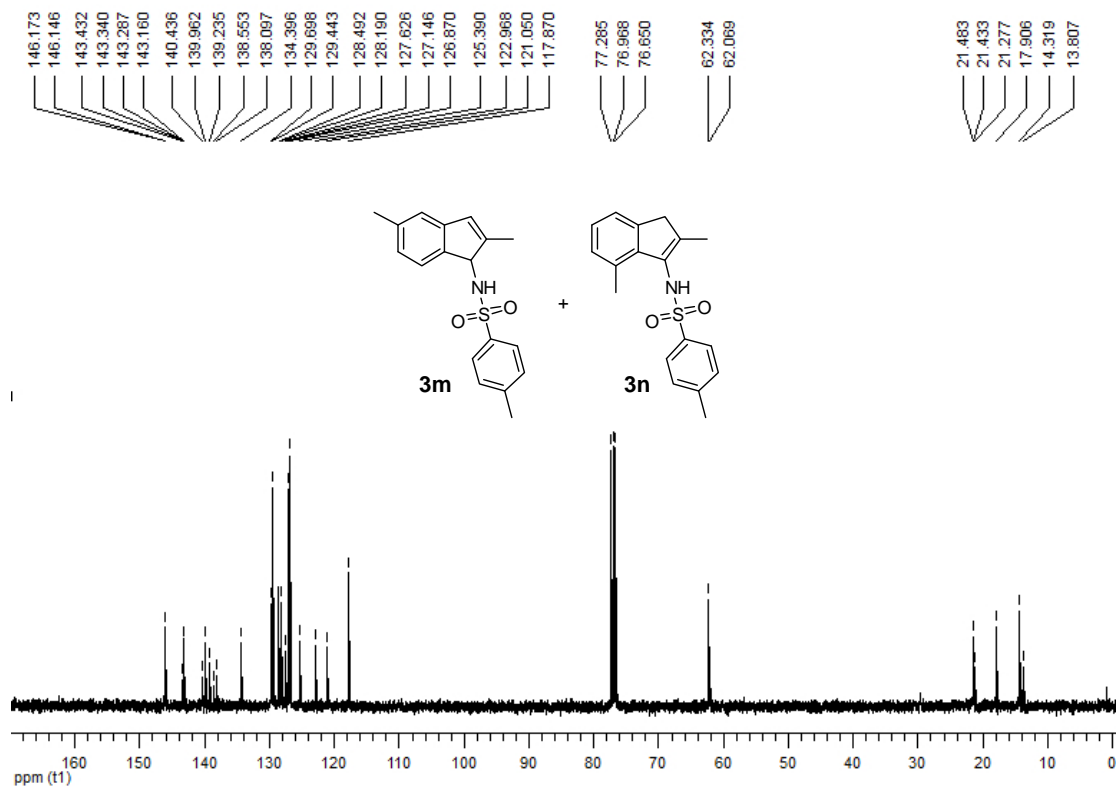



# <sup>1</sup>H NMR

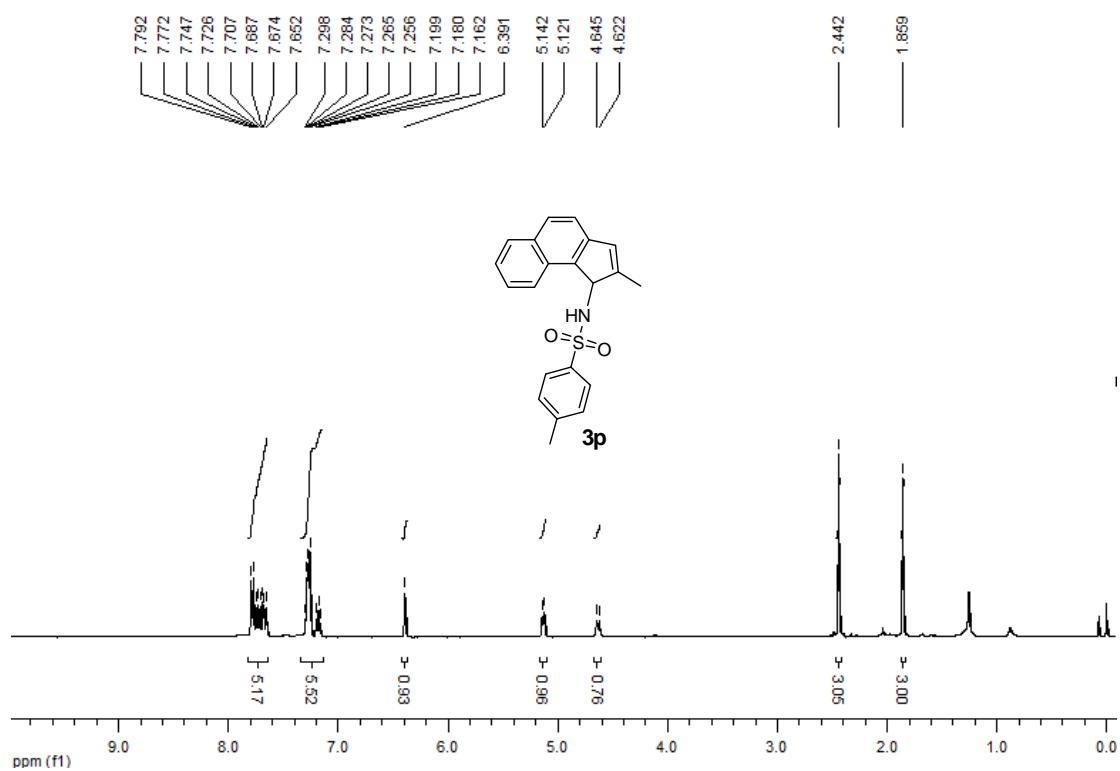

# <sup>13</sup>C NMR

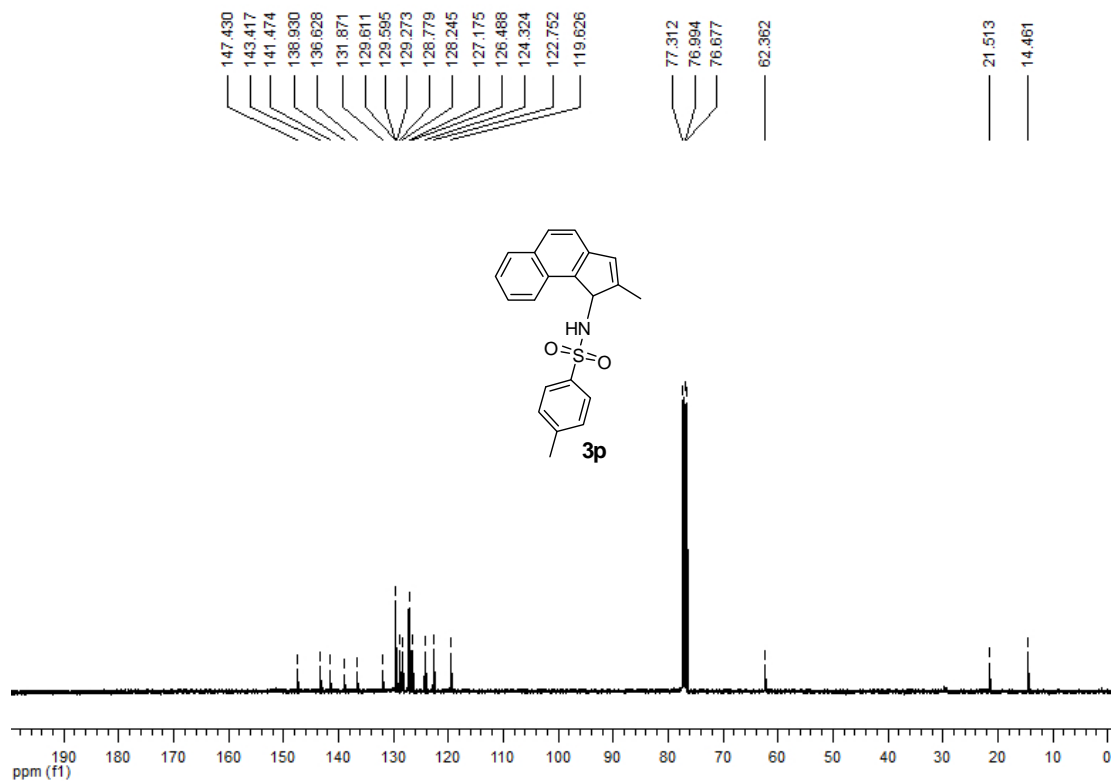

# <sup>1</sup>H NMR

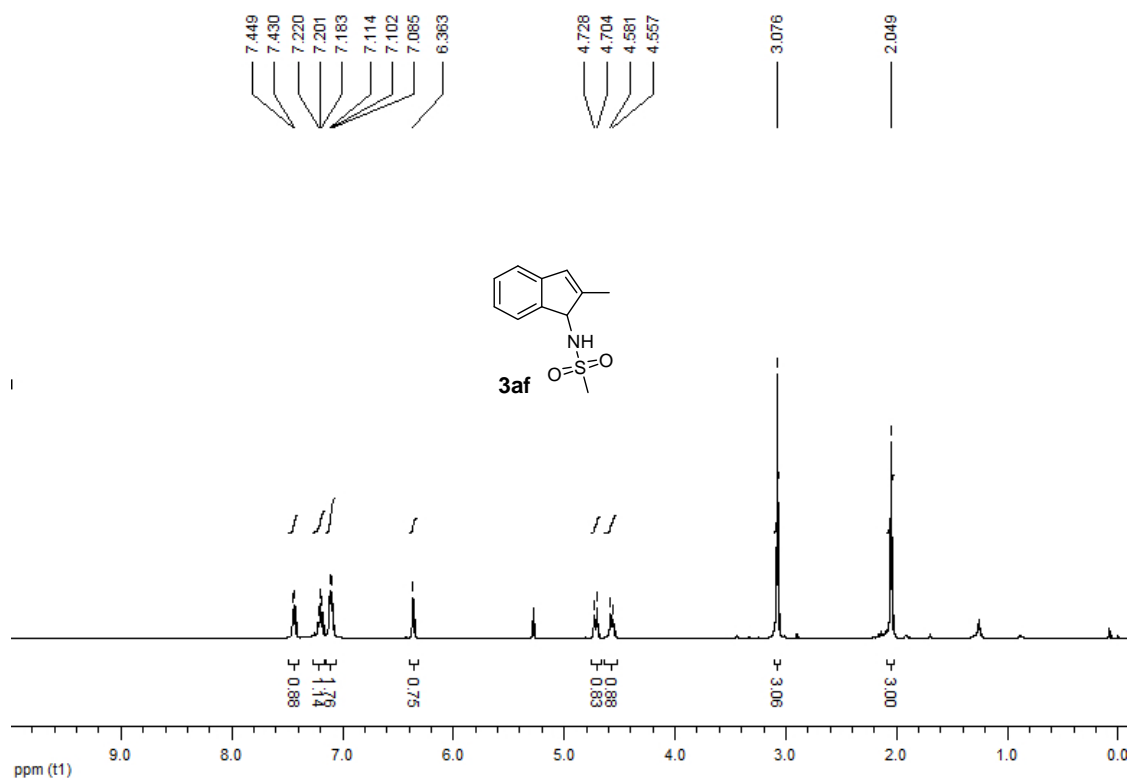

# <sup>13</sup>C NMR

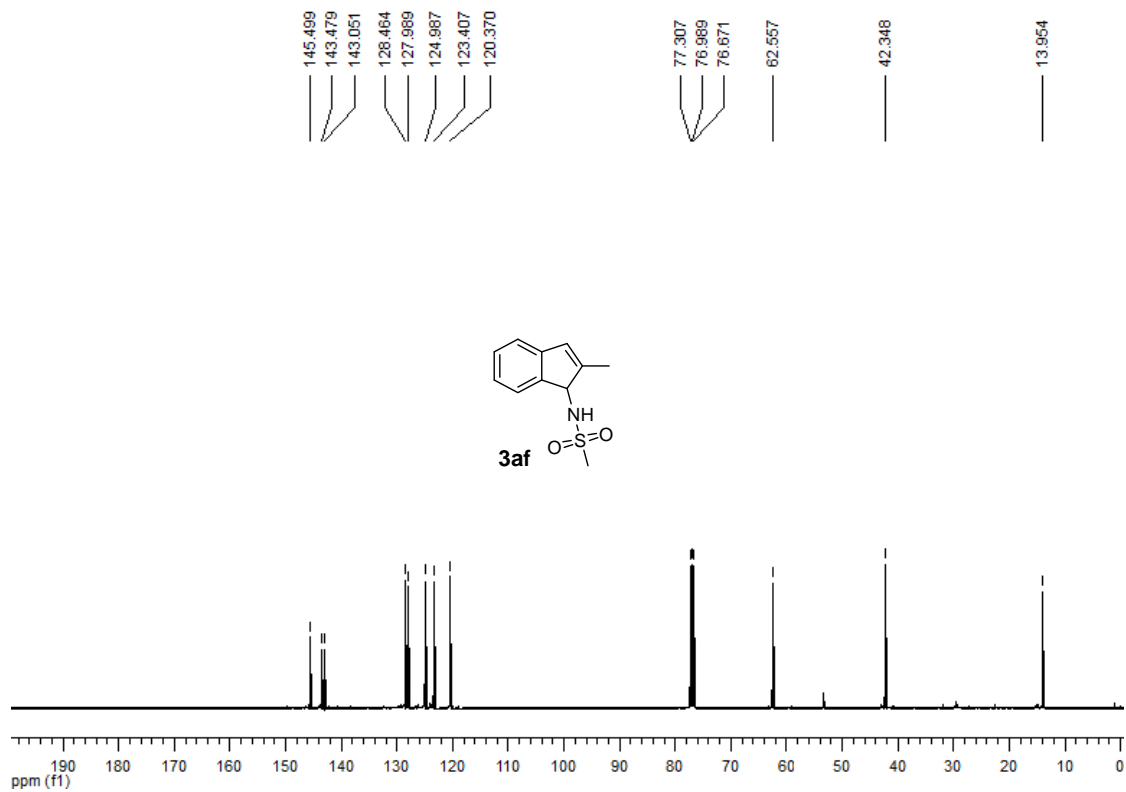

# <sup>1</sup>H NMR

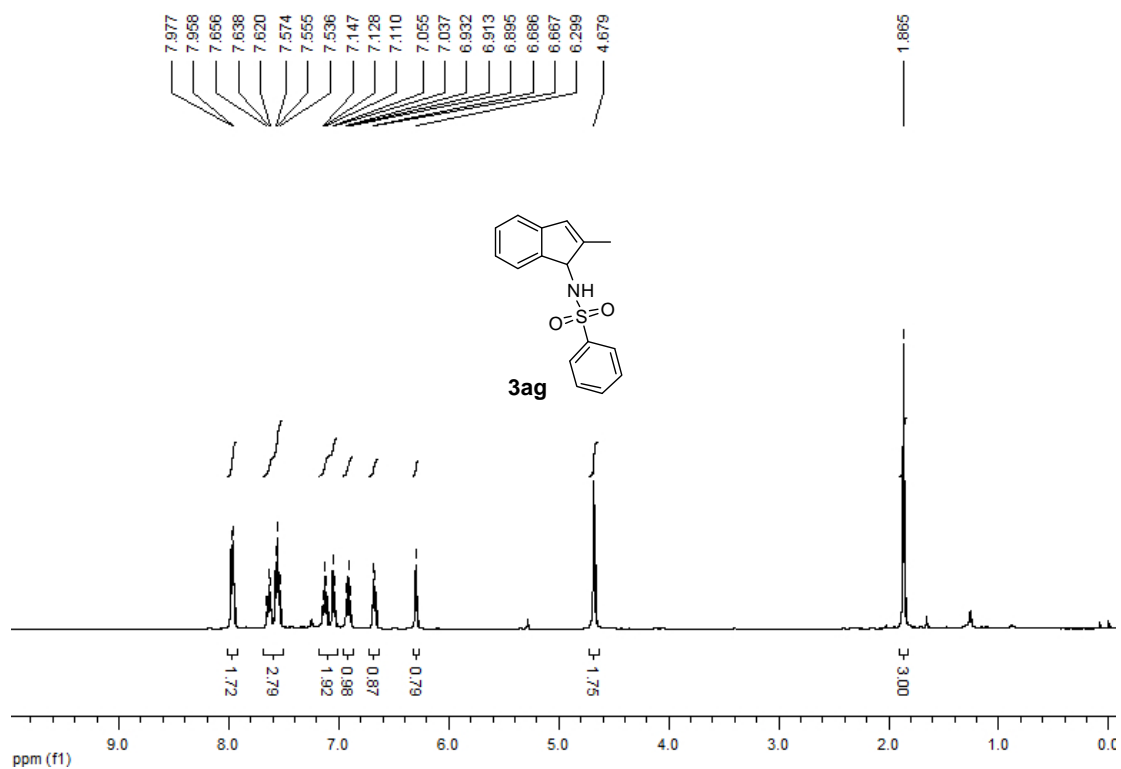

# <sup>13</sup>C NMR

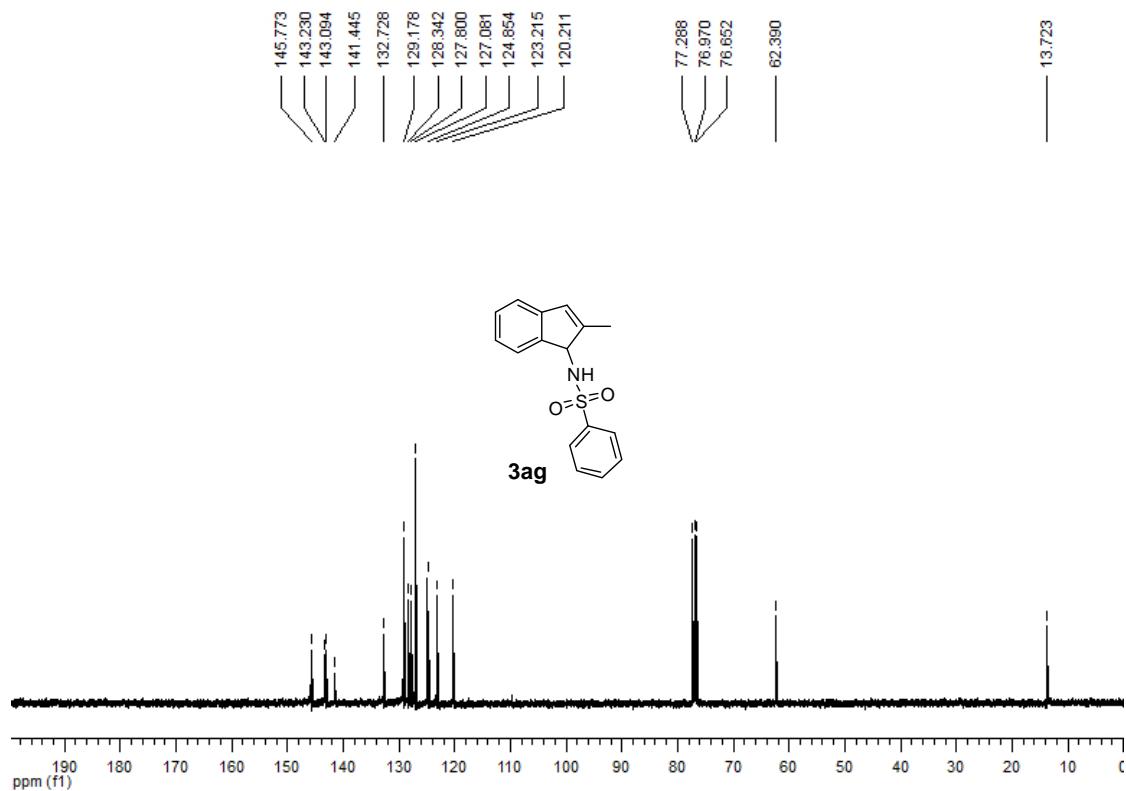



# <sup>1</sup>H NMR

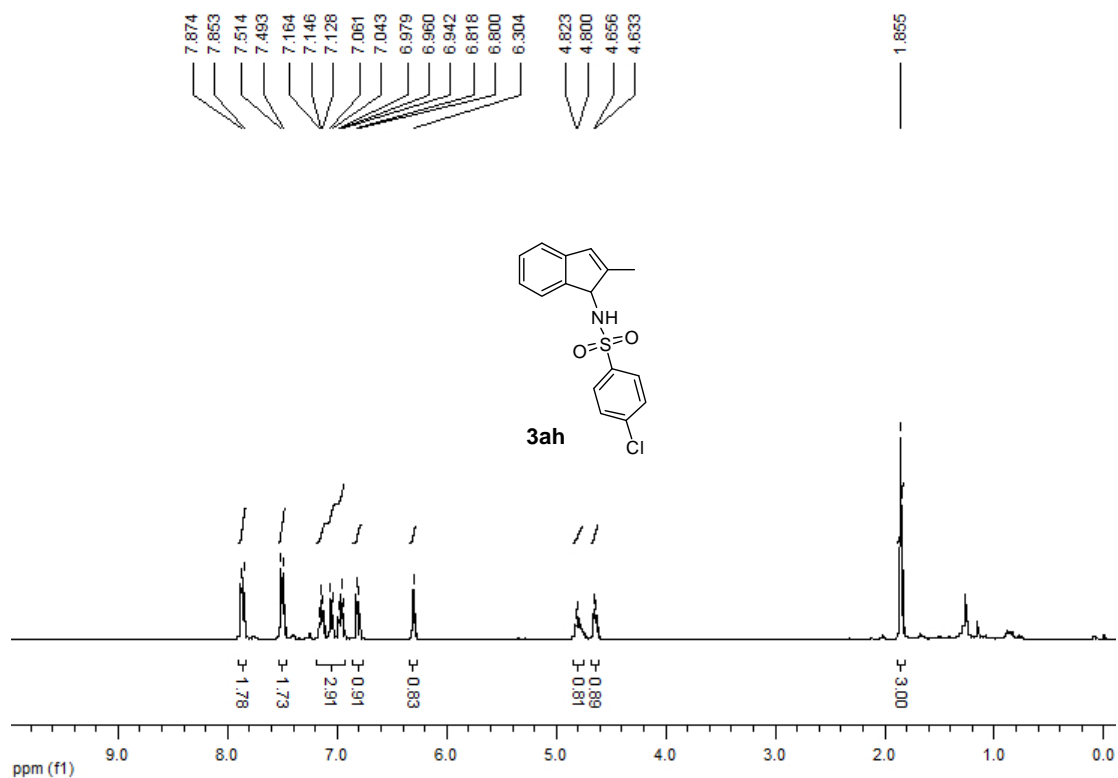

# <sup>13</sup>C NMR

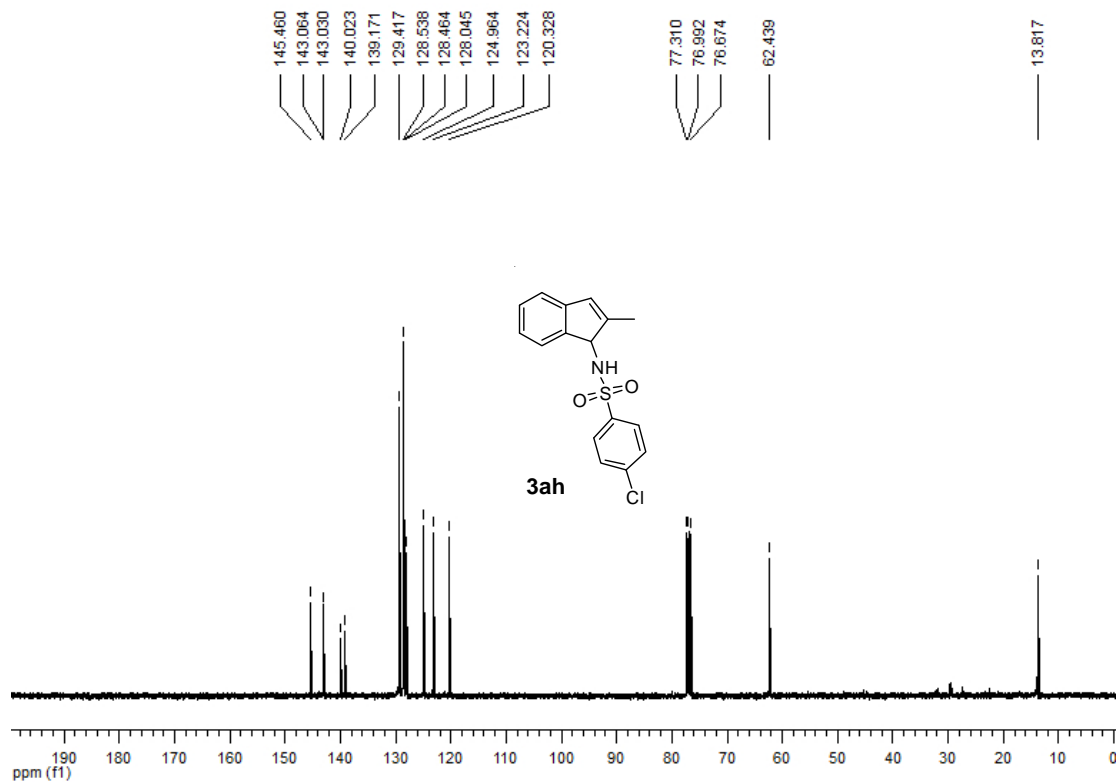

# <sup>1</sup>H NMR

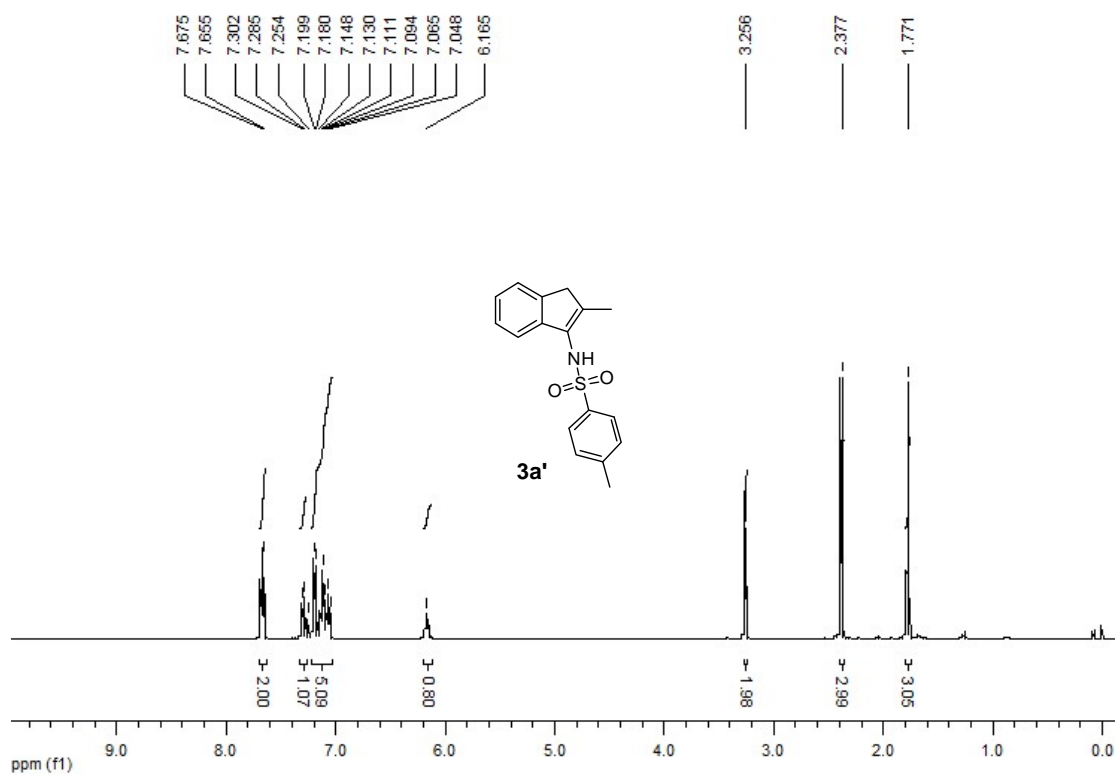

# <sup>13</sup>C NMR

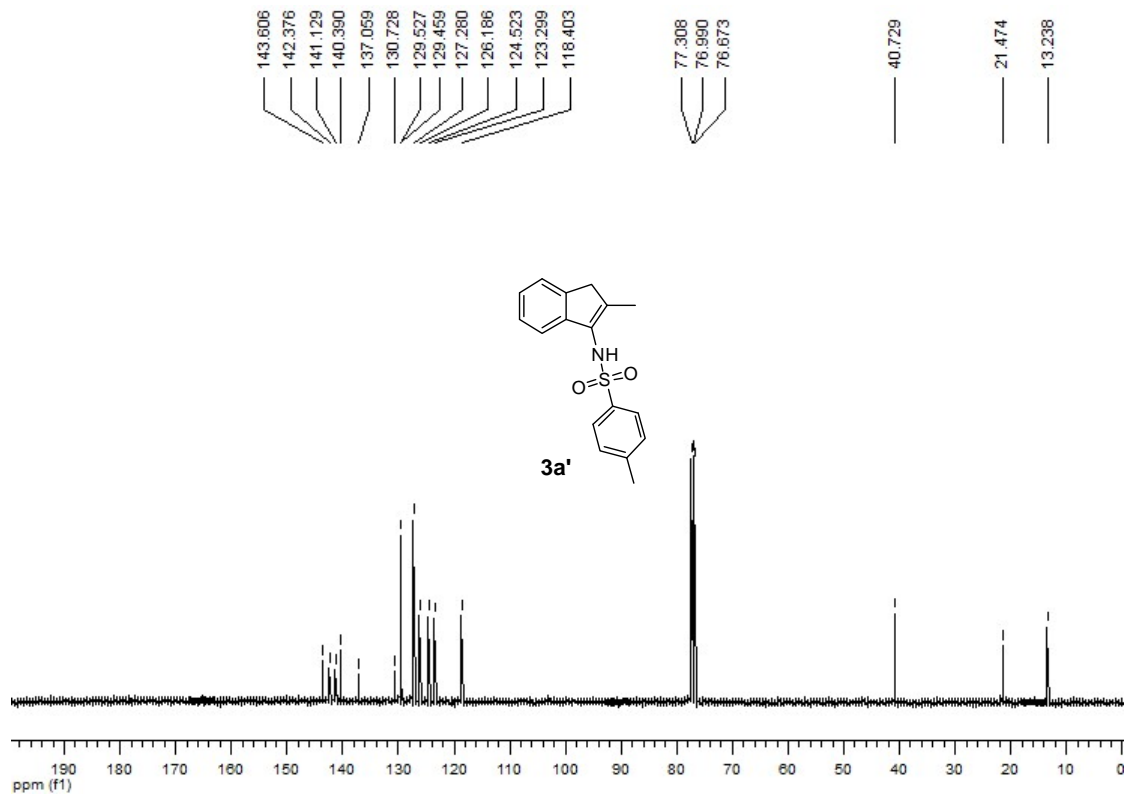

Supplement: c4cc00310a1.pdf [file c4cc00310a1.pdf]
